# 1 ***Photorhabdus* Virulence Cassettes: extracellular multi-protein needle** 2 **complexes for delivery of small protein effectors into host cells.**

3  
4 Isabella Vlisidou<sup>1</sup>, Alexia Hapeshi<sup>2</sup>, Joseph R. J. Healey<sup>2</sup>, Katie Smart<sup>2</sup>, Guowei Yang<sup>3\*</sup>  
5 and Nicholas R. Waterfield<sup>2\*</sup>

6  
7 \* Joint corresponding authors:

8 <sup>1</sup> Atlas Genetics. Bristol, United Kingdom.

9 <sup>2</sup> Warwick Medical School, Warwick University, Coventry CV4 7AL, UK.

10 <sup>3</sup> Beijing Friendship Hospital, Capital Medical University. Beijing. China.

11

## 12 **ABSTRACT**

13 *Photorhabdus* is a highly effective insect pathogen and symbiont of insecticidal  
14 nematodes. To exert its potent insecticidal effects, it elaborates a myriad of toxins and  
15 small molecule effectors. Among these, the *Photorhabdus* Virulence Cassettes (PVCs)  
16 represent an elegant self-contained delivery mechanism for diverse protein toxins.  
17 Importantly, these self-contained nanosyringes overcome host cell membrane barriers,  
18 and act independently, at a distance from the bacteria itself. In this study, we  
19 demonstrate that Pnf, a PVC needle complex associated toxin, is a Rho-GTPase, which  
20 acts via deamidation and transglutamination to disrupt the cytoskeleton. TEM and  
21 Western blots have shown a physical association between Pnf and its cognate PVC  
22 delivery mechanism. We demonstrate that for Pnf to exert its effect, translocation across  
23 the cell membrane is absolutely essential.

## 24 **SIGNIFICANCE STATEMENT**

25 Here we provide an up to date analysis of the nano-scale syringe-like molecular devices  
26 that *Photorhabdus* use to manipulate invertebrate hosts, the PVC system. They are  
27 related to the *Serratia* Anti-Feeding Prophage and the *Pseudomonas* MAC

28 system. All these systems are in turn more distantly related to the well characterized  
29 Type VI secretion system currently receiving a great deal of attention. We demonstrate  
30 for the first time that the PVC nanosyringes are physically “loaded” with an effector  
31 protein payload before being freely released. The PVCs therefore represent bacterial  
32 molecular machines that are used as “long-range” protein delivery systems. This  
33 widespread class of toxin delivery system will likely prove of great significance in  
34 understanding many diverse bacteria/host interactions in future.

35

## 36 INTRODUCTION

37 Bacteria belonging to the Enterobacteriaceae genus *Photorhabdus* exist in a symbiotic  
38 partnership with entomopathogenic *Heterorhabditis* sp. nematodes. This  
39 Entomopathogenic Nematode complex (EPN) comprises a highly efficient symbiosis of  
40 pathogens that is commonly used as a biological agent to control crop pests [1]. The  
41 *Photorhabdus* bacteria are delivered into the hemocoel of the insect, after regurgitation  
42 from the worm, where they resist the insect immune response and rapidly kill the host  
43 via septicaemic infection. Insect tissues are subsequently bio-converted into a dense  
44 soup of *Photorhabdus* bacteria, which provide a food source to support the replication of  
45 the nematode. As food resources are depleted *Photorhabdus* re-associates with  
46 infective juvenile nematodes, and together they emerge from the insect cadaver able to  
47 re-infect a new host [2, 3]. Three major species have been formally recognized to date  
48 within the genus - *P. luminescens*, *P. asymbiotica*, and *P. temperata*. It should be noted  
49 however that with increasing numbers of *Photorhabdus* genome sequences becoming  
50 available, the genus structure is under revision [4]. In addition to the normal insect life  
51 cycle, *P. asymbiotica* is also the etiological agent of a serious human infection termed  
52 *Photorhabdosis*, which is associated with severe ulcerated skin lesions both at the initial  
53 infection foci and later at disseminated distal sites [5-8].

54 The *Photorhabdus* genome encodes a diverse repertoire of virulence genes encoding  
55 for protein toxins, proteases and lipases for combating diverse hosts, that can be found  
56 in chromosomally encoded pathogenicity islands [9-14]. In addition the bacteria also

57 secrete a potent cocktail of other biologically active small molecules to preserve the  
58 insect cadaver in the soil from competing saprophytes and microbial predators such as  
59 amoeba [15, 16]. Several classes of *Photorhabdus* protein insecticidal toxins have now  
60 been well characterised including the Toxin Complexes [17-24], the binary PirAB toxins  
61 [25-27] and the large single polypeptide Mcf (“makes caterpillars floppy”) toxins [28-30].

62 A fourth class of highly distinct toxin delivery systems first identified in *Photorhabdus* are  
63 the “*Photorhabdus* virulence cassettes”, or PVCs [31]. These represent operons of  
64 around 16, conserved, structural and synthetic genes (from hereon just described as the  
65 structural genes) encoding for a phage “tailocin” like structure [32] and one or more  
66 tightly linked downstream toxin-effector like genes. Genomic analysis of multiple strains  
67 of *Photorhabdus* revealed they often encode up to five or six copies of the operon, each  
68 with unique downstream effector genes [33].

69 It should be noted that PVC-like elements are not restricted to *Photorhabdus* as a well-  
70 characterized homologous operon can also be found on the pADAP plasmid of the  
71 insect pathogenic bacteria *Serratia entomophila* [34]. This system has been named the  
72 anti-feeding prophage (AFP), as it is responsible for the cessation of feeding in the New  
73 Zealand grass grub host. Recent cryo-electron microscopy studies have revealed that,  
74 morphologically, AFP resembles a simplified version of the sheathed tail of  
75 bacteriophages such as T4, including a baseplate complex. It also shares features with  
76 type-VI secretion systems, with the central tube of the structure having a similar  
77 diameter and axial width to the Hcp1 hexamer of *P. aeruginosa* T6SS [35]. One  
78 important difference between the PVC and T6SS machinery is that the T6SS relies  
79 upon direct contact between host and bacterial cell, and is anchored in to the  
80 membrane by a substantial membrane complex whose structure is still being elucidated  
81 [36], whereas the PVC needle complex is freely released into the surrounding milieu  
82 and so can act at a distance.

83 Furthermore, recent reports have indicated that other more diverse bacteria can also  
84 make similar needle complexes for manipulation of eukaryotic hosts. A well-  
85 characterized example is the production of analogous devices by the marine bacterium

86 *Pseudoalteromonas luteoviolacea* (Figure 1A). These structures are involved in the  
87 developmental metamorphosis of the larvae of the tubeworm *Hydroides elegans*, and  
88 they are deployed in outward-facing arrays comprising about 100 contractile structures,  
89 with baseplates linked by tail fibres in a hexagonal net [37]. Interrogation of sequence  
90 databases with PVC protein sequences suggests many other more diverse tailocin-like  
91 systems are yet to be characterized [38]. These include operons closely related to the  
92 PVCs in *Xenorhabdus bovienii* CS03, *Yersinia ruckeri* ATCC29473 and *Vibrio*  
93 *campbellii* AND4. In addition, evidence of more diverse elements, like that of *P.*  
94 *luteoviolacea*, can also be seen. To address this, we have recently performed an  
95 exhaustive analysis of all available prokaryotic and archaeal genome sequences in the  
96 public databases to look at the distribution of *pvc*-like elements (unpublished data). This  
97 suggests that PVC-like nano-syringes and their distant cousins are of enormous  
98 ecological and perhaps biomedical significance.

99 Here we focus on a single *Photorhabdus pvc* operon (which elaborates the *PVCpnf*  
100 needle complex [31] to understand the relationship between the structural genes and  
101 the tightly linked effector gene, *pnf*. We confirm *in vivo* expression during insect  
102 infection and reveal a high level of population heterogeneity of expression *in vitro*. We  
103 demonstrate for the first time the physical association of the Pnf effector toxin protein  
104 with the secreted structural needle complex using Western blot and electron  
105 microscopy. Furthermore, we prove that the cognate Pnf effector needs to be delivered  
106 into the eukaryote cell cytoplasm to exert any measurable effect and confirm its  
107 predicted activity targeting small Rho-GTPase target proteins. Taken together this work  
108 describes an important new class of protein toxin secretion and injection delivery  
109 systems which, unlike the well-described Types III, IV and VI systems, can act “at a  
110 distance”, requiring no intimate contact between bacteria and host cells.



A

(i) *P. luteoviolacea mac* gene cluster

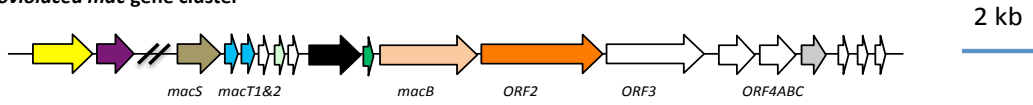

(ii) *Burkholderia mallei* T6SS

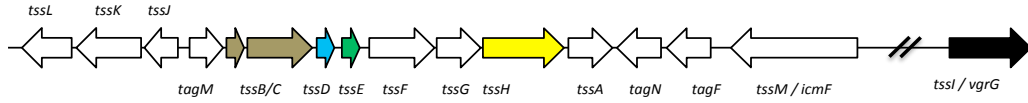

B

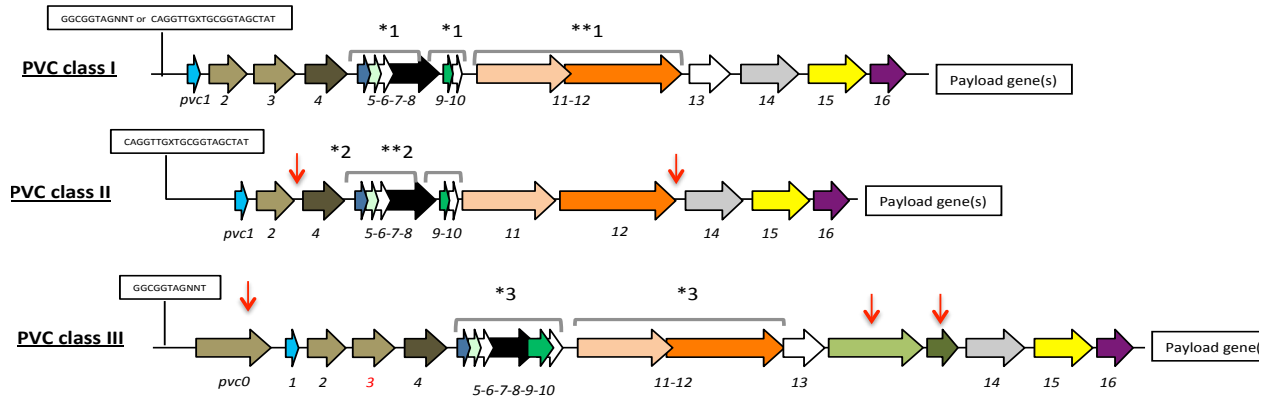

111

112 **Figure 1 (A)** Similarity between PVCs and two diverse protein secretion systems, (i) the  
 113 *P. luteoviolacea mac* gene cluster and (ii) The type-VI secretion system (T6SS) from  
 114 *Burkholderia mallei*. Homologous protein sequences are coloured coded. **(B)** Three  
 115 classes of PVC structural operons observed in the genomes of *Photothabdus* and  
 116 members of other genera. Types 1-3 are exemplified by *PVCpnf*, *PVClopT* and  
 117 *PVCPaTox* respectively. Homologous genes are colour coded. Red arrows represent  
 118 variations relative to the representative type I *PVCpnf* operon of *P. asymbiotica*  
 119 ATCC43949, *pvc1* (PAU\_03353) to *pvc16* (PAU\_03338). Predicted functions of  
 120 individual Pvc proteins based on homology to known proteins can be seen in FigS1C.  
 121 The boxed “GGCGGTAGNNT” or “CAGGTTGXTGCGGTAGCTAT” sequences  
 122 represent positions of the conserved RfaH anti-termination protein and cryptic operator  
 123 sequences respectively. Square brackets above certain genes indicate apparent  
 124 translational coupling. More specifically; \*1 indicates coupling in *PVCpnf* and *PVCcif* of  
 125 *PI<sup>TT01</sup>*, *Pa<sup>ATCC43949</sup>*, *Pa<sup>PB68</sup>* and *Pa<sup>Kingscliff</sup>* and in the *Serratia entomophila afp* operon in  
 126 addition to an uncharacterised PVC in *Yersinia ruckeri* ATCC 29473. \*\*1 indicates these  
 127 genes are not coupled in *Pa<sup>Kingscliff</sup>*. \*2 indicates coupling in *PVClopT* of *PI<sup>TT01</sup>*,  
 128 *Pa<sup>ATCC43949</sup>*, *Pa<sup>PB68</sup>* and *Pa<sup>Kingscliff</sup>*. \*\*2 indicates these genes are not coupled in *Pa<sup>Kingscliff</sup>*.  
 129 \*3 indicates coupling in *PVCPatox* of *Pa<sup>ATCC43949</sup>* and *Pa<sup>Kingscliff</sup>* (although *pvc11* possibly  
 130 contains a frame-shift in *Pa<sup>Kingscliff</sup>*). The *pvc3* is also deleted in *Pa<sup>Kingscliff</sup>*.

131

## 132 RESULTS

133 **A bioinformatic analysis of *pvc* structural operon sequences.** A comparison of *pvc*  
134 structural operons identified in the genome sequences of *Photorhabdus* and certain  
135 members of other genera, available at the time of publication ([12, 14, 39] and our  
136 unpublished data), allowed us to define three distinct genetic sub-types. The PVC*pnf*  
137 operon belongs to class I, which has 16 structural genes and three translationally  
138 coupled gene blocks, and is of the type typically seen in non-*Photorhabdus* genera.  
139 Class II and III operons differ in the number of structural genes and translationally  
140 coupled gene blocks (Figure 1B). Given the diversity of *pvc*-operons, and their typically  
141 poor annotation in genome sequences, it is necessary here to define a nomenclature  
142 protocol to allow reference to any given operon. An example of the method we have  
143 adopted is as follows; [*Pa*<sup>ATCC43949</sup> PVC*pnf*], where *Pa*<sup>ATCC43949</sup> is species and strain, in  
144 this case *Photorhabdus asymbiotica* strain ATCC43949 and PVC*pnf* is the specific  
145 operon within that genome with the suffix referring to one of the tightly linked effectors,  
146 in this case the *pnf* effector gene. We will also include gene identifiers for either end of  
147 the operon where appropriate, which in this case would be PAU\_03353-PAU\_03332,  
148 which are the genes for *pvc1* and *pnf* respectively.

149 With reference to published literature and a detailed bioinformatic analysis of promoter  
150 regions upstream of the *pvc1* genes, we can identify two distinct, potential *cis*-operator  
151 sequences. Firstly operons belonging to classes I (e.g. PVC*pnf*) and III (e.g.  
152 PVC*PaTox*) typically encode the highly conserved RfaH operator sequence,  
153 GGCGGTAGNNT [40]. It is possible that more degenerate RfaH operator sequences  
154 exist in other operons although this remains unclear. Secondly, all class II operons (e.g.  
155 PVC*lopT*) and certain class I operons (e.g. PVC*units1-4*) encode a minimal cryptic  
156 conserved sequence motif, CAGGTTGXTGCGGTAGCTAT. In both cases these  
157 conserved *cis*-encoded sequences are located between the *pvc1* gene and the  
158 transcription start sites, as defined by previous RNA-seq analysis ([41] and unpublished  
159 data).

160 Several observations suggest that horizontal gene transfer has been responsible for the  
161 dissemination of many observed *pvc*-operons. These include; the location of the *S.*  
162 *entomophila* *afp* on a horizontally transmissible plasmid, the presence of four *pvc*  
163 operons in tandem in *P. luminescens* TT01 (directly adjacent to a type IV DNA  
164 conjugation pilus operon), the presence of multiple *pvc* operons in any given genome  
165 and the suggestion that several operons are regulated by RfaH. While there is no  
166 experimental evidence to confirm an exact mechanism by which this may occur, a  
167 closer inspection of the sequences flanking [*PI*<sup>TT01</sup>*PVCu4*] suggests that at least this  
168 operon was acquired as a composite transposon. Remnants of insertion sequence (IS)  
169 elements can be seen flanking this operon, with only the outer inverted repeats  
170 remaining intact [TTATATTGAA(t/g)GAATATTAAGCAAGAAAC], and YhgA-like IS  
171 transposase genes belonging to the (transposase\_31 superfamily) still associated with  
172 both the 5' and 3' flanks of the *PVCu4* operon. It should be noted that IS element  
173 remnants could also be seen flanking many other *pvc* operons suggesting that IS  
174 dependant transposition has been a common mechanism involved in *pvc* horizontal  
175 dissemination. However, our own phylogenetic studies suggest that *pvc*-operons have  
176 been co-evolving with their host genomes for some time, indicating that horizontal  
177 transfer is likely the method of original acquisition, but may not be as active presently.  
178 This is supported by the fact that an automatic prediction of horizontal gene transfer  
179 regions (HGTs) using Alien Hunter 1.7 [42] either did not detect any HGT elements  
180 spanning the structural regions of PVCs or in the cases where such an element was  
181 detected it was assigned a low confidence score (Figure S2).

182 An analysis of the conservation of individual genes across different *pvc* operons at both  
183 DNA and protein sequence levels suggests that either recombination or diversifying  
184 selection is more likely to have occurred in the more 3' regions of the operons (Figure  
185 S1A). This is perhaps no surprise as each *pvc* operon can be seen to encode different  
186 effector genes in the 3' payload region of the operons. An analysis of conservation of  
187 protein sequences of the *pvc* operons showed that within *pvc*-operons a good deal of  
188 variability is possible while presumably retaining the ability to produce a similar  
189 macromolecular structure (Figure S1B). This is supported by HHPRED structural  
190 homology comparisons for equivalent PVC proteins across different operons, despite

191 often-variable primary amino acid sequences (data not shown). We note that the most  
192 diverse protein seen in *pvc*-operons is that of the predicted tail fibre proteins, Pvc13,  
193 which we may expect if different *pvc*-operons are adapted for different host cell targets.  
194 Paralogous genes within *pvc*-operons include *pvc1* and *pvc5* which encode homologs of  
195 Hcp, the inner tube protein of contractile tube mechanisms such as T6SS and phage  
196 protein Gp27 and *pvc2*, -3 and -4 which encode homologues of the outer sheath  
197 proteins of phage [43] and T6SS [44]. Figure S1C illustrates the organisation of the  
198 [*Pa*<sup>ATCC43949</sup> PVC*pnf*] operon used as a model system in our experimental studies  
199 described here, showing the top HHPRED structural homology hits and predicted roles  
200 for each encoded protein at the time of writing.

201 **A bioinformatic analysis of *pvc*-operon effector gene sequences.** A comparison of  
202 the 3' effector “payload regions” of different *pvc* operons reveals a large diversity of  
203 effector genes, with a range of predicted activities, covering a large range of sizes and  
204 isoelectric point values (data not shown). Some operons encode only a single putative  
205 effector, e.g. [*Pa*<sup>ATCC43949</sup> PVC*PaTox* PAU\_02249-02230] while others have several,  
206 either tandem homologues of one another, e.g. [*Pa*<sup>ATCC43949</sup> PVC*u4* PAU\_02790-02808]  
207 or entirely unrelated putative effector genes, e.g. [*Pa*<sup>ATCC43949</sup> PVC*lopT* PAU\_02112-  
208 02095]. Many effector genes are also tightly linked to transposase gene remnants  
209 suggesting they are typically exchanged by horizontal acquisition. This is further  
210 supported by the observation that orthologous *pvc*-operons in the same chromosomal  
211 context may have different effector genes in different strains. A good example of this  
212 being the unrelated effector genes seen in the orthologous structural “PVC*pnf*” operon  
213 loci of *Pa*<sup>Kingscliff</sup> and *Pa*<sup>ATCC43949</sup> which carry a tyrosine glycosylase and Pnf (this paper)  
214 respectively. Analysis with Alien Hunter 1.7, suggests that certain *pvc*-operon / effector  
215 associations are ancestral to any given species. For example the association of the  
216 *pvc17* effector with PVC*u4*, and the multiple linked effectors with the PVC*lopT* operon in  
217 both *Pa*<sup>ATCC43949</sup> and *P*<sup>TT01</sup>. Conversely other *pvc*-operons show evidence of recent  
218 horizontal acquisition of their 3'linked effectors, e.g. PVC*cif* and PVC*pnf* (not shown)

219 **Expression of PVC*pnf* in vitro and in vivo.** A previous RNA-seq analysis of global  
220 transcription in three strains; *P. asymbiotica*<sup>ATCC43949</sup> [41], *P. asymbiotica*<sup>Kingscliff</sup> and *P.*

221 *luminescens*<sup>TT01</sup> (unpublished) showed condition dependent expression of certain *pvc*-  
222 operons but not all. Therefore, due to the diversity of *pvc* operons and effectors in  
223 *Photorhabdus*, we focused on a single model class I *pvc* operon, [*Pa*<sup>ATCC43949</sup> PVC*pnf*],  
224 to elucidate the relationship between the conserved structural and effector proteins.  
225 This operon was selected as it elaborates a well-defined needle complex structure (as  
226 observed by electron microscopy) which has potent insect killing activity when  
227 heterologously expressed in *E. coli* [31]. This operon has two putative effector genes in  
228 the downstream “payload region”, PAU\_03337, which shows similarity to adenylate  
229 cyclase toxins (e.g. the anthrax Edema Factor and Pseudomonas ExoY toxin) and *pnf*  
230 (PAU\_03332). While the predicted activity of PAU\_03337 has not been tested directly,  
231 when expressed in the NIH-3T3 cell cytoplasm (in transient transfection experiments) it  
232 did produce a highly unusual cytoskeleton phenotype [31]. Pnf (*Photorhabdus* *necrosis*  
233 *factor*) is a homologue of the active site domain of the *Yersinia* CNF2 (Cyto Necrosis  
234 Factor 2) toxin, which has small-GTPase deamidase and transglutaminase activities  
235 [45].

236 In order to confirm the expression of this model *pvc*-operon in *Photorhabdus* during an  
237 insect infection we constructed transcription-translation reporter plasmids in which the  
238 promoter regions and the first 150 bp of coding sequence of *pvc1*, *pnf* [both from  
239 *Pa*<sup>ATCC43949</sup> PVC*pnf*] and the *P. asymbiotica* chromosomal *rpsM* ribosomal  
240 “housekeeping” gene (as a positive control) were genetically fused in frame to a  
241 *gfpmut2* gene with no start codon (referred to hereon as *pvc1::gfp*, *pnf::gfp* and  
242 *rpsM::gfp* reporters). Note, the genomic context and our previous unpublished RT-PCR  
243 studies suggested that *pnf* had its own promoter and could be transcribed  
244 independently of the *pvc* structural genes. As we are unable to transform *Pa*<sup>ATCC43949</sup>  
245 itself, these plasmids were transformed into the well-characterised and genetically  
246 tractable strain *P. luminescens*<sup>TT01</sup> to provide suitable reporter strains for *in vitro* and *in*  
247 *vivo* expression studies. For *in vitro* studies we cultured the bacteria in LB medium  
248 supplemented with *Manduca sexta* clarified hemolymph and grown to late stationary  
249 phase, before microscopic examination. For *in vivo* studies, we injected the reporter  
250 strains into *M. sexta*, and allowed the infection to establish before macroscopic  
251 examination of insect tissues *in situ* using a (fluorescence) dissecting microscope. We

252 also took hemolymph samples from these insects and visualised the hemocytes and  
253 bacteria microscopically using confocal microscopy.

254 Figure 2A shows expression of GFP reporter from the *rpsM* positive control and both  
255 the *pvc1::gfp* and *pnf::gfp* reporters in LB supplemented with *M. sexta* hemolymph,  
256 although not in all cells of the bacterial population (see below). Furthermore, we also  
257 saw expression in bacteria in the *ex vivo* hemolymph samples taken during infection of  
258 live insects (Figure 2A). It was also possible to confirm expression of *pnf::gfp* in bacteria  
259 attached to the insect trachea in localised putative biofilm masses. In this case, while  
260 the expected insect melanisation immune response could be seen to have occurred  
261 elsewhere on the trachea, it was notably absent from the *pnf* expressing bacterial  
262 biomass (Figure 2B). In order to corroborate the observations made using the plasmid  
263 based reporter constructs in *P. luminescens*<sup>TT01</sup> we also performed RT-PCR analysis of  
264 transcription of the PVC*pnf* chromosomal operon in the original *Pa*<sup>ATCC43939</sup> strain. This  
265 confirmed transcription across the operon *in vitro* when the bacteria were grown at  
266 either 28°C or 37°C, although transcription of certain genes was difficult to detect *in vivo*  
267 during *Manduca sexta* infections (Figure S3).



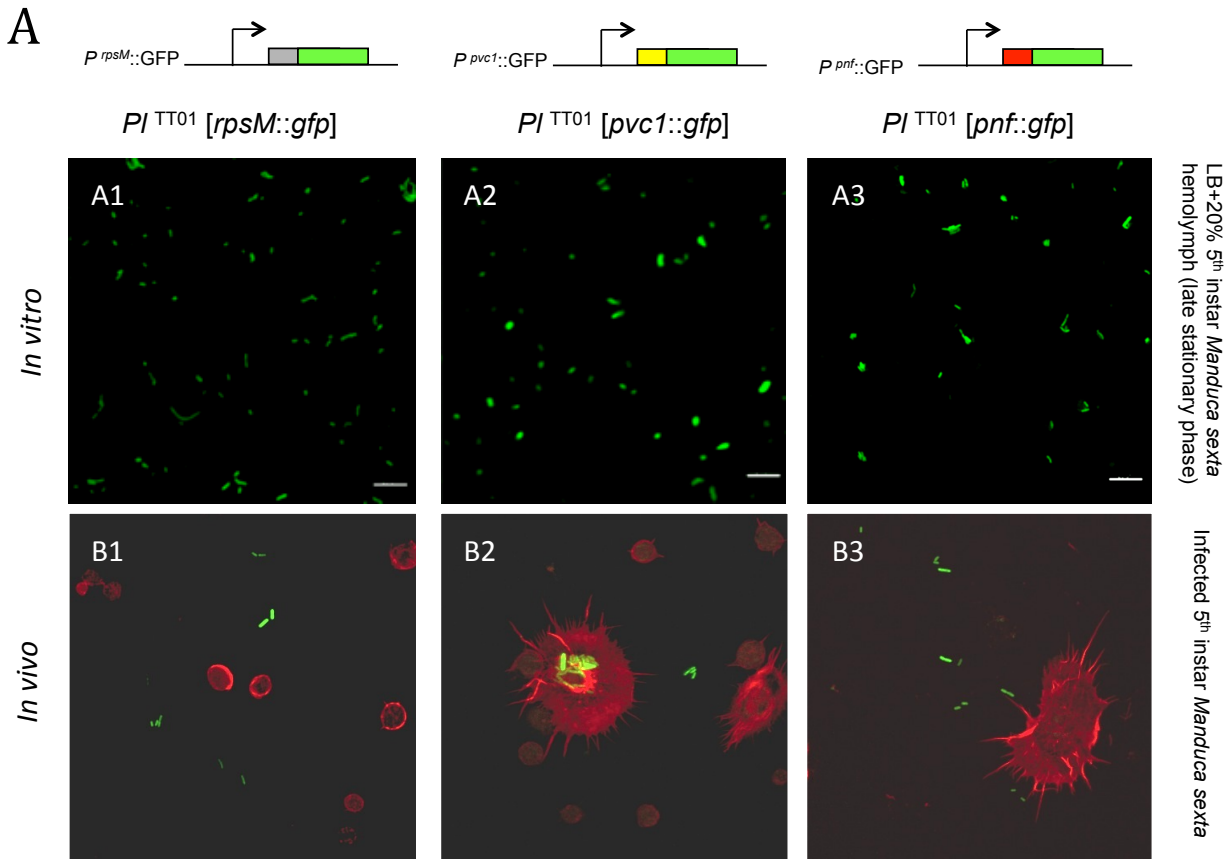

268

**B**

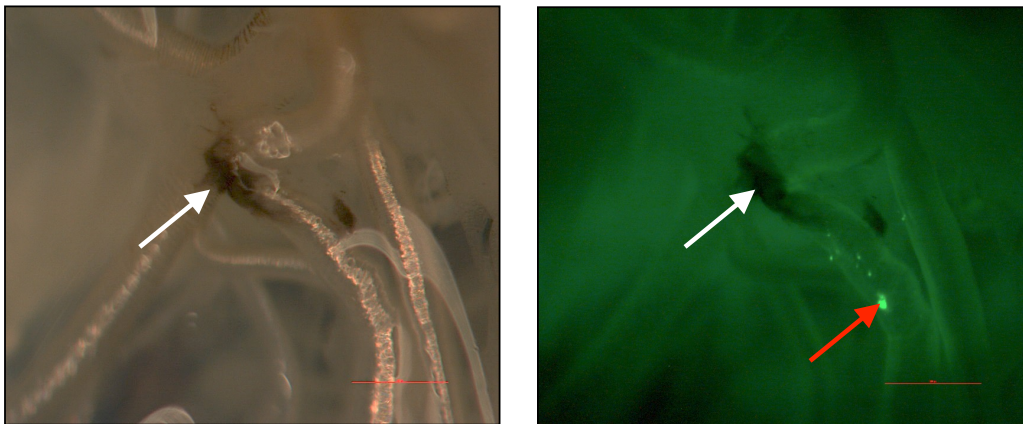

269

270

271 **Figure 2. (A)** Confocal micrographs of showing *in vitro* (A1-A3) and *in vivo* (B1-B3)  
 272 expression in *PI<sup>TT01</sup>* of *gfp* transcription-translation reporter constructs of *Pa<sup>ATCC43949</sup>*  
 273 *PVCpnf* operon gene promoters. These plasmid-based reporters were constructed by  
 274 fusing the transcription promoter regions and the first 37 codons of the target gene in  
 275 frame with the second codon of *gfp*. Target gene promoters shown are (A1 and B1) the  
 276 constitutively expressed *rpsM* gene, (A2 and B2) the *Pa<sup>ATCC43949</sup>* *PVCpnf pvc1* structural  
 277 gene and (A3 and B3) *Pa<sup>ATCC43949</sup>* *PVCpnf pnf* payload toxin gene. The *in vitro* panels



278 (A1-3) show reporter expression after growth in LB supplemented with 20% (v/v) 5<sup>th</sup>  
279 instar *M. sexta* hemolymph at late stationary phase. The *in vivo* panels show *ex vivo*  
280 hemolymph from 5<sup>th</sup> instar *M. sexta* infected with *PI*<sup>TT01</sup> harbouring the three different  
281 reporter constructs. The hemocyte cytoskeletons are stained red with TRITC-Phalloidin  
282 conjugate. (B) White light (left) and fluorescence illumination (right) of the trachea of a  
283 dissected 5<sup>th</sup> instar *M. sexta* previously infected with *PI*<sup>TT01</sup> harbouring the *Pa*<sup>ATCC43949</sup>  
284 *PVC*<sup>pnf</sup> *pnf::gfp* reporter construct. Brightly fluorescent green bacteria were detected in  
285 association with the trachea (red arrow) in close proximity to melanotic nodules (white  
286 arrows), demonstrating the induction of the *pnf* promoter and the production of the  
287 Pnf::GFP fusion *in situ*. Bars show 0.1mm.  
288

289 We subsequently expanded this analysis to include a transcription-translation reporter  
290 plasmid for the promoter and *pvc1* gene of an orthologue of *PVCpnf* from a different *P.*  
291 *asymbiotica* strain, [*Pa*<sup>PB68</sup> *PVCpnf*]. In this case, we used fluorescence microscopy to  
292 assess the expression pattern across the growth phases of the originator *Pa*<sup>PB68</sup> strain  
293 harbouring the reporter plasmid, when grown in LB with aeration and maintaining  
294 plasmid marker selection. Interestingly we observed a high level of population  
295 heterogeneity in expression with only very few cells expressing GFP at any one time  
296 (Figure S4). A similar level of heterogeneity in expression was also seen for reporter  
297 constructs from seven other *pvc*-operons from both *Pa*<sup>PB68</sup> and *PI*<sup>TT01</sup> (data not shown).  
298 We also assessed expression in biofilms grown statically on glass slides and observed  
299 the same pattern, though with even fewer cells seen to express GFP (data not shown).

### 300 **The Pnf effector protein is physically associated with the PVC needle complex.**

301 We investigated if the Pnf effector protein actually becomes physically associated with  
302 the *pvc*-encoded needle complex we had previously visualised by electron microscopy  
303 [31]. To do this we raised anti-peptide antibodies against synthetic peptides  
304 representing amino acids 206-219 of Pnf (TGQKPGNNEWKTGR) and amino acids 130-  
305 143 (DGPETELTINGAEE) of predicted outer sheath protein Pvc2. Previously we used  
306 2D-SDS PAGE analysis of *PVCpnf* needle complex produced by an *E. coli* cosmid  
307 clone to confirm the presence of Pvc2, along with Pvc1, 3, 5, 11, 14 and 16 proteins  
308 ([31] and unpublished data). We confirmed specificity of the Pnf antibody using western  
309 blot analysis of extracts of *E. coli* heterologously expressing Pnf alone.

310 We first used the anti-Pnf peptide antibody to test for the presence of Pnf protein in  
311 supernatants from the native bacterial strain *Pa*<sup>ATCC43949</sup>. We tested for the presence of  
312 Pnf in needle complex enriched particulate preparations and clarified supernatants. We  
313 could detect Pnf in preparations enriched for the complexes but not in clarified  
314 supernatants. More specifically, the Pnf protein could only be detected in the needle  
315 complex fraction, if it was first either chemically or physically disrupted before  
316 electrophoresis (Figure 3B). Taken together these findings are consistent with the  
317 hypothesis that the Pnf protein is sequestered inside the needle complex or in some  
318 other configuration such that the TGQKPGNNEWKTGR epitope is physically hidden  
319 from access by the antibody.

320 Secondly we enriched needle complexes from insect toxic supernatants of an *E. coli*  
321 cosmid clone that encodes the *Pa*<sup>ATCC43949</sup> PVC*pnf* operon, as previously described  
322 [31]. The anti-Pnf antibody was used for *in situ* labelling of Pnf on Transmission Electron  
323 Microscopy grids, visualised with negative staining and an anti-rabbit gold-conjugate  
324 secondary antibody. It was only possible to detect Pnf protein near the ends of either  
325 contracted or damaged needle complexes (Figure 3A). Note we saw no non-specific  
326 labelling when the gold-conjugate secondary antibody was used alone. In the case of  
327 the Pvc2 antibody, we only saw a signal associated with what appeared to be disrupted  
328 fragments of needle complexes suggesting the Pvc2 epitope is not normally solvent  
329 exposed in intact needle complexes.

330

331

332

333

334

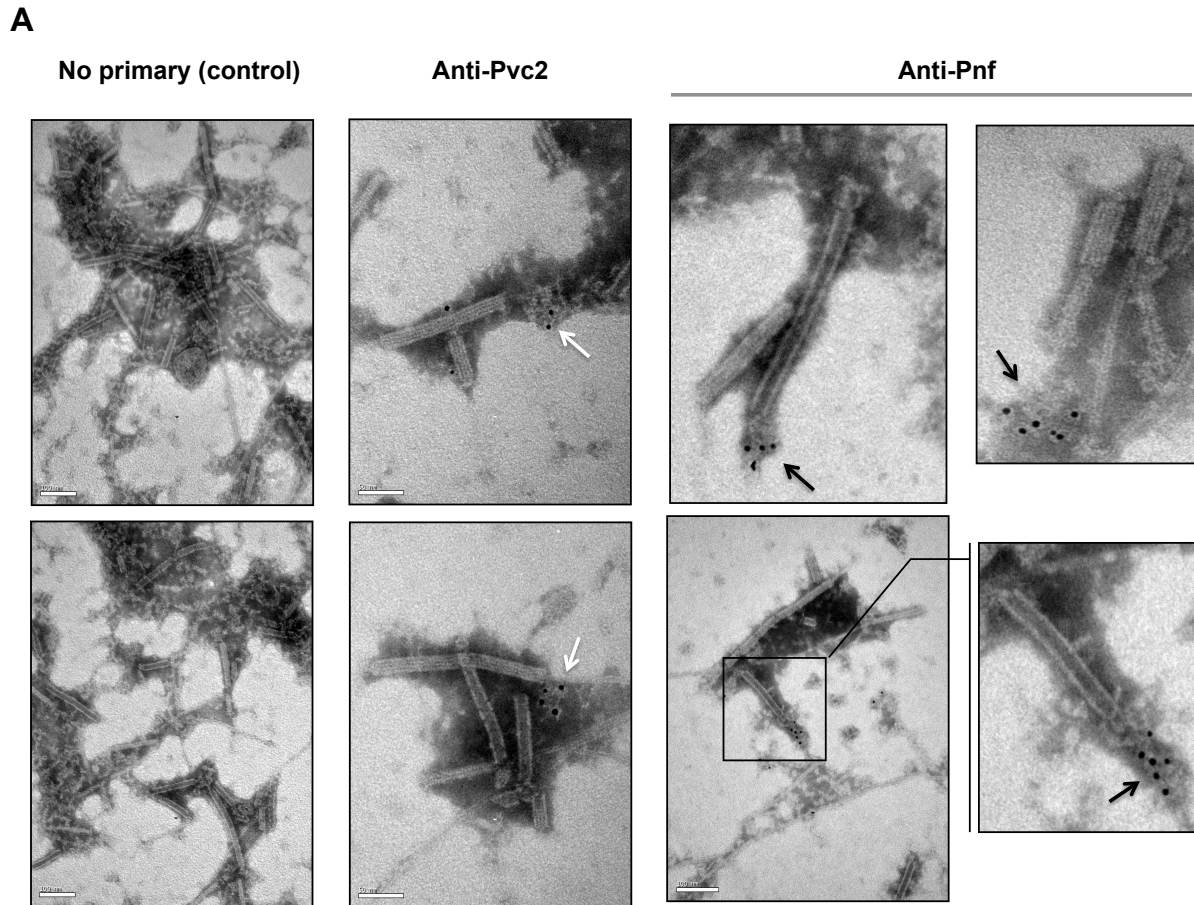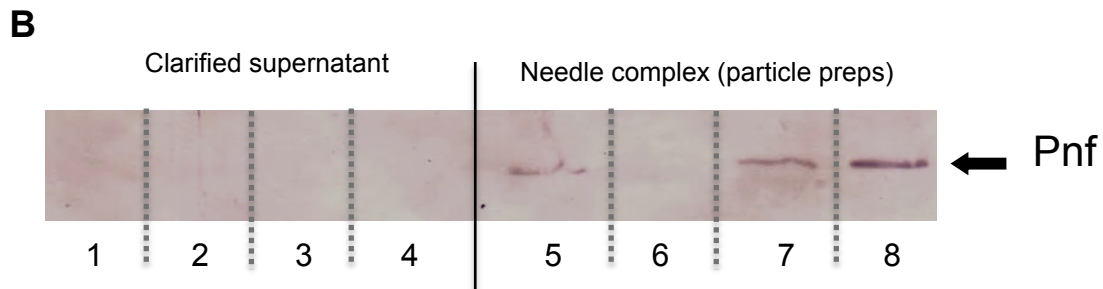

337 **Figure 3. (A)** Representative images of immuno-gold stained transmission electron  
338 microscopy grids confirming the Pnf-payload toxin is associated with the needle  
339 complex. PVC $pnf$  needle complexes (PVC-NC) were prepared from supernatants of the  
340 *E. coli* 4df10 cosmid clone, which encodes the PVC $pnf$  operon. We used anti-peptide  
341 antibodies against Pvc2 (DGPETELTINGAEE) and Pnf (TGQKPGNNEWKTGR)  
342 epitopes to localise these protein subunits. The Pvc2 epitope appeared to only become  
343 accessible to the antibody when subunits were “broken off” the ends (white arrows). The  
344 Pnf toxin could also only be detected at the ends of broken or contracted suggesting  
345 they are contained within the complex (black arrows). **(B)** Western blot analysis  
346 confirms that the Pnf protein can only be detected using the anti-peptide antibody if the  
347 needle complex is either chemically or physically disrupted. These preparations were

348 taken from *Pa*<sup>ATCC43949</sup> supernatants. The inability to detect Pnf in clarified supernatants  
349 confirms all the protein is associated with the PVC-NC enrichment preparation. Lanes  
350 1+5; sonicated samples, 2+6; 1M NaCl treatments, 3+7; 1% SDS treatments 4+8; 1M  
351 Urea treatments. Note the PVC-NC appears stable in 1M NaCl.

352

353 **The Pnf protein requires delivery into the eukaryotic cell cytoplasm to exert its**  
354 **effect.** In a previous publication we reported that injection of an enriched *Pa*<sup>ATCC43949</sup>  
355 PVC*pnf* needle complex preparation; heterologously produced by an *E. coli* cosmid  
356 clone, caused melanisation and death of *Galleria mellonella* larvae within 30 minutes. In  
357 addition, microscopic analysis of phalloidin stained hemocytes taken from these dying  
358 animals revealed the cells were shrunken with highly condensed cytoskeletons, and  
359 likely already dead. This effect was abolished by heat denaturing the preparation. In this  
360 same publication [31] we demonstrated that transient cytoplasmic expression of the Pnf  
361 protein caused extensive cytoskeleton re-arrangement and likely cell death in cultured  
362 human HeLa cells, similar to that observed in the *ex vivo* *G. mellonella* hemocytes. In  
363 an attempt to directly visualise the interaction of the heterologously produced PVC*pnf*  
364 needle complex with insect hemocytes and to determine the initial effects on the cellular  
365 morphology, we injected intact or heat denatured PVC*pnf* needle complex preparations  
366 into 5<sup>th</sup> instar *Manduca sexta* larvae before bleeding the animals and preparing their  
367 circulating hemocytes for surface examination by cryo-SEM. The surface of hemocytes  
368 injected with intact complex showed membrane ruffling consistent with the predicted  
369 mode of action of the Pnf protein (see below). Furthermore, we could also see linear  
370 structures approximately 150nm in length on the surface of the cells near the sites of  
371 membrane ruffles consistent with attached needle complexes. The surface of the control  
372 hemocytes injected with heat-denatured complex remained relatively smooth and  
373 homogeneous and we saw no equivalent linear structures. Figure 4 shows  
374 representative images from these experiments.

375

376



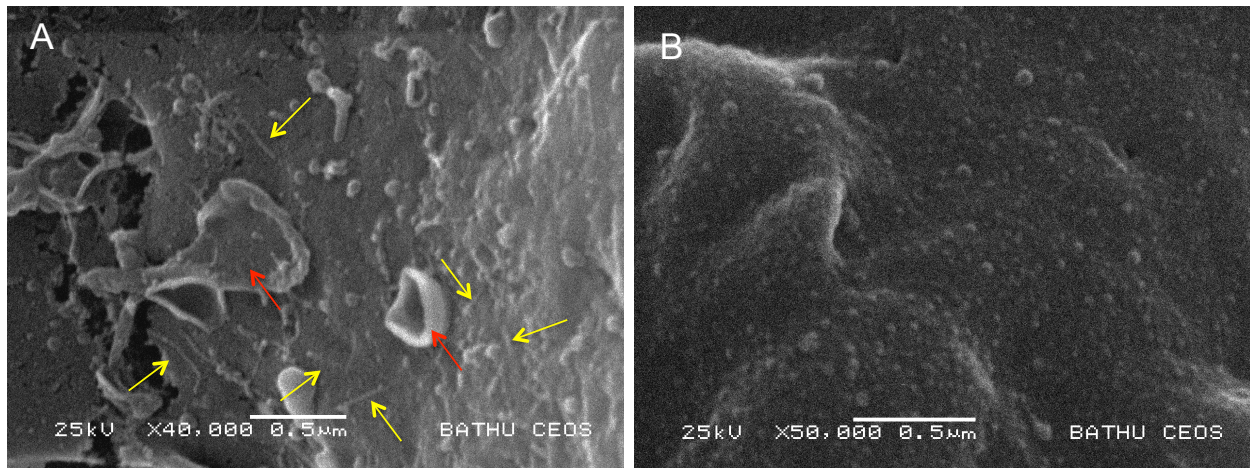

377

378 **Figure 4.** Cryo-SEM analysis of *ex vivo* hemocytes from 5<sup>th</sup> instar *Manduca sexta* that  
379 had been injected with a native (A) or heat inactivated (B) enriched preparation of  
380 *Pa*<sup>ATCC43949</sup> PVCpnf needle complexes heterologously produced by the *E. coli* cosmid  
381 clone. Note the abundant linear structures believed to be the PVC needle complex  
382 (yellow arrows) and membrane ruffling effect (red arrows) absent from the control  
383 treatment.  
384

385 We wished to know if the Pnf effector could exert this toxic effect independently of the  
386 needle complex, when applied externally to eukaryotic cells. Therefore we  
387 heterologously expressed (in *E. coli*) and purified the Pnf protein in addition to a  
388 predicted toxoid derivative. The toxoid was designed based on homology between Pnf  
389 and the CNF2 toxin active site, wherein we mutated the cysteine at amino acid position  
390 190 into an alanine (Pnf<sup>C190A</sup>). Firstly, neither purified wild type nor toxoid proteins had  
391 any obvious toxic effect when injected into cohorts of *G. mellonella*, even at high doses  
392 (data not shown). We subsequently used bioPORTER, a liposome based transfection  
393 system, to introduce the purified proteins directly into cultured human cells. We  
394 visualised effects on the cytoskeleton and nucleus using TRITC-phalloidin and DAPI  
395 staining respectively. The wild type Pnf protein had a very clear effect on the cells,  
396 producing phenotypes consistent with those predicted by similarity to the CNF2 toxin.  
397 CNF2 is known to modify the cellular Rho GTPases, RhoA, Rac1 and Cdc42. Pnf  
398 delivery as a bioPORTER formulation lead to the formation of F-actin filaments within  
399 24h followed by multi-nucleation by 48h, phenotypes consistent with the modification of  
400 the Rho GTPases. The toxoid derivative, delivered at the same dose using the same  
401 approach, produced no changes, giving cellular phenotypes consistent with that of the

402 negative control or of the wild-type Pnf protein topically applied without the bioPORTER  
403 transfection agent (Figure 5).

404

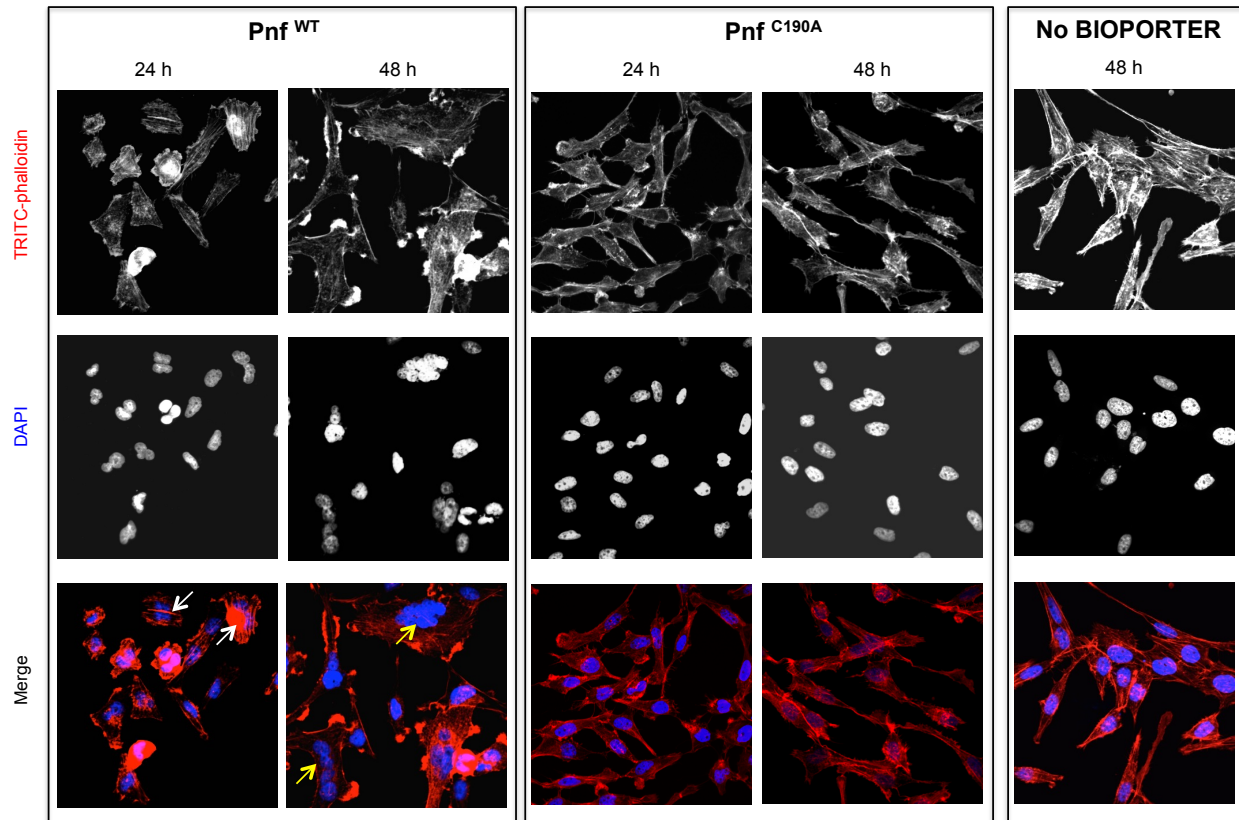

405

406 **Figure 5.** Pnf needs to gain access to the host cell cytoplasm to induce F-actin  
407 formation and multi-nucleation in HeLa cells. Wild-type and inactive toxoid mutant Pnf  
408 protein was delivered topically using BioPORTER. Cell cytoskeleton is stained with  
409 TRITC-Phalloidin and the cell nuclei with DAPI. This gave rise to phenotypes consistent  
410 with the molecular targets and that of the *Yersinia* CNF2 protein homologue. Note we  
411 see the F-actin formation by 24 h (white arrows) preceding extensive multi-nucleation of  
412 the host cell by 48 h (yellow arrows). Note neither application of the Pnf toxoid in a  
413 BioPORTER formulation or the purified wild-type Pnf protein without BioPORTER had  
414 any observable effect on the cells.

415

416 **The Pnf protein effector modifies small Rho GTPases.** Based on homology to CNF2  
417 the effect of Pnf on target cell proteins is predicted to include the modification of several  
418 Rho-family GTPases. Therefore we used western blot assays to examine *in vitro*  
419 transglutamination and deamidation effects of purified heterologously produced Pnf on  
420 purified small GTPases RhoA, Rac1 and Cdc42. Transglutamination is the formation of

421 a covalent bond between a free amine group, as may be found on a lysine residue, and  
 422 the gamma-carboxamide group of glutamine. As a result protein electrophoretic mobility  
 423 of the protein is altered. Deamidation is a chemical reaction in which an amide  
 424 functional group is removed from the protein, which may be detected using deamidated  
 425 protein specific antibodies. These experiments demonstrated that Pnf induced  
 426 transglutamination and deamidation of both RhoA and Rac1 (Figure 6), although unlike  
 427 the reported activity of CNF2, had no effect on Cdc42. As predicted the active site  
 428 toxoid mutant had no enzymic activity on any of the three Rho GTPases confirming it  
 429 was a true toxoid derivative.

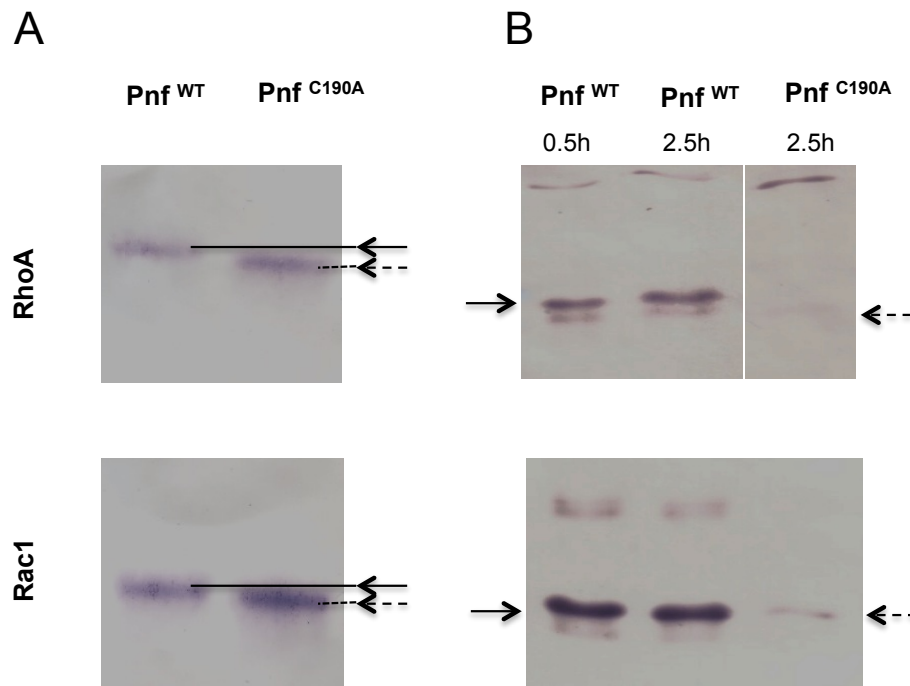

430  
 431  
 432 **Figure 6.** Pnf transglutaminates and deamidates purified mammalian RhoGTPases at  
 433 Gln63 (RhoA) and Gln 61 (Rac1). (A) For transglutination assays a 2:1 molar ratio of  
 434 small Rho GTPase to purified Pnf was incubated in transglutination buffer in the  
 435 presence of ethylenediamine for 1 hour at 37°C. Note transglutinated GTPase runs slightly  
 436 slower on the gel as visualised using anti RhoA and Rac1 antibodies. (B) For  
 437 deamidation assays a 20:1 molar ratio of Rho GTPases; RhoA and Rac1, to purified Pnf  
 438 toxin was incubated in deamidation buffer for either 30 min or 2.5 hours at 37 °C. Note  
 439 deamidation is detected using an antibody specific towards deamidated Rho GTPase  
 440 antigens. In both cases, the wild-type Pnf protein was active (solid arrows) while a site  
 441 directed amino acid C190A toxoid mutant (in the predicted Pnf active site) showed no  
 442 activity (dotted arrows).

443



## 444 **DISCUSSION**

445 An analysis of the different subunit proteins of PVCs show they share several elements  
446 in common with other contractile phage-tail derived systems, including the Type VI  
447 secretion system (T6SS) [46] and to a lesser extent R-type pyocins [47]. However PVC-  
448 like elements are distinct in two important ways. Firstly, unlike the T6SS, they are freely  
449 released from the producing bacterial cell and so, in common with R-type pyocins, they  
450 can act at a distance. Secondly, like T6SS but unlike R-type Pyocins, they are evolved  
451 to inject bioactive protein effectors into other cells. We hypothesise that the PVCs are  
452 evolved to specifically target eukaryotic cells, unlike T6SS, which have been shown to  
453 be able to deliver to both eukaryotes and prokaryotic competitors. However, while our  
454 previous attempts to show *PVCpnf* attachment to a range of bacterial species from  
455 different genera showed no binding we could detect (data not shown), we cannot rule  
456 out the possibility that homologues exist which are able to target prokaryotes.

457 We speculate that these large protein complexes are costly for the cell to produce,  
458 consistent with the observation of population heterogeneity of *pvc*-operon expression.  
459 Indeed, uncontrolled heterologous over expression in *E. coli*, as cosmid clones, results  
460 in deletion of regions of the *pvc*-operon and loss of viability (unpublished data). It should  
461 be noted that in a natural insect infection the vast majority of the *Photorhabdus* bacterial  
462 population are sacrificial. The majority of the population act as a food source for the  
463 replicating nematodes, with very few cells passing into the next generation of infective  
464 juvenile nematodes [2]. As such the population may restrict PVC production to a limited  
465 number of sacrificial cells. The method of PVC release remains unclear, although to  
466 date we have not observed cell lysis associated with *pvc* expression. The finding that  
467 *Pa*<sup>ATCC43949</sup> *PVCpnf*, and seven other *pvc*-operons from *Pa*<sup>PB68</sup> and *Pt*<sup>TT01</sup>, all show  
468 population heterogeneity in expression, at least *in vitro*, suggests that they are likely  
469 deployed in a highly regulated and conservative manner. While it is difficult to fully  
470 characterise this heterogeneity *in vivo*, the *PVCpnf* GFP reporter strain did show  
471 restricted expression to one specific tissue, the spiracles, and not throughout the body  
472 of the insect. In regards to these experiments, it should be noted that we did not see  
473 any melanisation response around the bacterial biomass showing GFP. The insect

474 melanisation immune response is typically activated at sites of encapsulation. This is  
475 mediated by the recruitment of hemocytes, surrounding and enclosing foreign bodies,  
476 and entombing them in melanin. The absence of melanisation around this GFP  
477 expressing bacterial mass is consistent with the expression of anti-hemocyte virulence  
478 genes, which are likely to include the native  $PI^{TT01}$  *pvc*-operons.

479  
480 Examination of the promoter regions has provided no clue as to the mechanism of  
481 population heterogeneity of expression. Nevertheless the identification of RfaH and a  
482 second cryptic conserved potential operator sequence upstream of the *pvc1* genes  
483 provides a starting point for addressing this in future. RfaH is a conserved anti-  
484 termination protein that is known to regulate large operons encoding for extracellular  
485 factors in *E. coli*. It is also believed to be important in ensuring appropriate  
486 transcriptional control of horizontally acquired operons [40]. Many of the *pvc*-operons in  
487 *Photorhabdus* and members of other genera (including *Xenorhabdus* and *Yersinia*)  
488 encode this operator sequence. An unusual example is the pADAP plasmid encoded  
489 *Serratia entomophila* anti feeding prophage (*afp*) [34]. While the *afp* promoter also  
490 encodes an RfaH operator sequence, it has been demonstrated that it is positively  
491 regulated by a tightly linked specific regulator protein, AnfA1 [48, 49]. This protein is a  
492 distant homologue of RfaH suggesting that other class I or III *pvc* operons are not  
493 necessarily under the regulation of the chromosomal RfaH orthologue, but might also be  
494 controlled by other diverse regulators that utilise this same operator sequence [50].  
495 Operons containing the second cryptic putative regulatory sequence include [ $PI^{TT01}$   
496 *PVClopT*] and [ $PI^{TT01}$  *PVCu4*]. Analysis of the supplementary data from a recently  
497 published RNA-seq study [51], suggests that these operons may be dependent upon  
498 Hfq/HexA activity [52].

499 Unlike many of the other genera in which we see *pvc*-like operons, *Photorhabdus*  
500 genomes encode multiple copies, typically around 5 to 6, suggesting they play important  
501 and diverse roles in the life cycle. With this in mind, we examined the conservation of  
502 the different subunit genes between operons. We observe a “break point” in  
503 conservation, toward the 3' end of the operons. We postulate this may be due to

504 imprecise recombination events in the 3' payload regions of *pvc*-operons, where  
505 incoming sequences, which have a GC-content that is distinct from the host genome,  
506 gradually 'erode' the upstream sequence. Alternatively, it is plausible that the lower GC  
507 at the distal end of these long operons (each of ~25kb) may assist in strand separation  
508 during transcription, maintaining stoichiometry for these large, multi-subunit structures.  
509 Indeed low GC stretches of DNA are common origins of replication because of their  
510 reduced strand separation energy [53]. However, as yet we do not know whether the  
511 *pvc1* promoter serves the whole operon, or if there are additional promoters internal to  
512 the operon.

513 Each of the *pvc*-operons in a *Photorhabdus* genome encodes multiple paralogous  
514 copies of *pvc1/5* and *pvc2/3/4* genes. We were therefore surprised not to see any  
515 operons showing signs of genetic degradation. This suggests there is sufficient positive  
516 selection for maintaining these multiple operons, with each operon potentially adapted  
517 for a specific role. This hypothesis is supported by the high variation in the Pvc13  
518 protein sequences, which we speculate represent the host cell binding fibres. The need  
519 to maintain multiple copies of *pvc*-operons may also have arisen if the structural genes  
520 for the needle complexes are specifically adapted for delivery of their cognate *cis*-linked  
521 effector proteins in some way.

522 Circumstantial evidence from genomic sequences and previous work on the related  
523 AFP system of *Serratia* has suggested the needle complexes serve to deliver the *cis*-  
524 encoded effector proteins. We present here for the first time direct evidence that a  
525 linked effector protein does in fact become physically associated with the needle  
526 complex. Western blot detection of Pnf from preparations enriched for needle  
527 complexes taken from the native *Pa*<sup>ATCC43949</sup> supernatants confirmed it was being  
528 expressed *in vitro* and suggested it was physically associated with the complexes. In  
529 addition, physical or chemical disruption was required to release the Pnf protein for  
530 detection. When taken alongside the immuno-gold EM observations, showing Pnf could  
531 only be seen near contracted or damaged needle complexes, it confirms the protein is  
532 either sequestered inside the complex or physically associated in such a way that the  
533 TGQKPGNNEWKTGR epitope is not solvent accessible. The anti-Pvc2 antibody is able

534 to specifically detect the protein in Western blots, however it only showed binding to  
535 what appeared to be disrupted fragments of needle complexes, again suggesting the  
536 relevant epitope is not accessible in the intact native needle complex structure. Indeed,  
537 iTasser structural model simulations of a PVC outer sheath Pvc2 protein, using the  
538 homologous *Pseudomonas* 3J9Q PDB structure of an R-type pyocin outer sheath as a  
539 model [54], supports this idea, suggesting the epitope is partially occluded between  
540 adjacent subunits.

541 While we have not yet directly demonstrated injection of Pnf into host cells by the  
542 needle complex, the results of the topical application and bioPORTER transfection  
543 experiments confirmed that the Pnf effector absolutely requires a mechanism to  
544 facilitate entry into the host cell cytoplasm to exert its effect. We argue the evidence for  
545 injection by the needle complex is very strong, and is corroborated by the SEM  
546 visualisation of needle-like structures of the correct dimensions on the surface of  
547 intoxicated hemocytes. Finally, we have confirmed that Pnf acts in a manner similar to  
548 the *Yersinia* CNF2 toxin, modifying two of the same Rho-GTPases, which correlates  
549 with the observed phenotypic effects on the cell.

550

## 551 **MATERIALS AND METHODS**

552 **Insects, bacterial strains and growth conditions.** *Manduca sexta* (Lepidoptera:  
553 *Sphingidae*) were individually reared as described [55]. Briefly, larvae were maintained  
554 individually at 25°C under a photoperiod of 17 h light: 7 h dark and fed on an artificial  
555 diet based on wheat germ. Larvae 1 day after ecdysis to the 5th instar were used for all  
556 experiments. Batches of wax moth larvae (75 g; Livefood UK Ltd, Rooks Bridge, UK) in  
557 their final instar stage were stored in the dark at 4°C and used within a week of receipt.  
558 DH5 $\alpha$ <sup>TM</sup> *E. coli* (containing various plasmid constructs) were grown on LB agar at 37°C  
559 or in LB liquid, shaking at 200 rpm. Spontaneous rifampicin-resistant mutants of  
560 *Photorhabdus asymbiotica subsp. asymbiotica* Thai (strain PB68.1) [56] and  
561 *Photorhabdus luminescens subsp. laumondii* TTO1 [12] were used in these studies as  
562 hosts for reporter plasmids. *Photorhabdus* were routinely cultured in LB broth or on LB

563 agar supplemented with 0.1 % (w/v) pyruvate at 30°C or 37°C (for *P. asymbiotica*).  
564 When required antibiotics were added at the following concentrations: ampicillin (Amp):  
565 100 µg ml<sup>-1</sup>, kanamycin (Km): 25 µg ml<sup>-1</sup>, chloramphenicol (Cm): 25 µg ml<sup>-1</sup>, rifampicin  
566 (Rif): 25 µg ml<sup>-1</sup>. HeLa ATCC CCL2 cells were cultured for 10 passages in Dulbecco's  
567 modified Eagle medium (Sigma-Aldrich) containing 4.5 g/L glucose (Sigma-Aldrich),  
568 10% heat-inactivated fetal bovine serum (Sigma-Aldrich), 2 mM glutamine (Sigma-  
569 Aldrich), 100 µg /mL penicillin, and 100 µg/mL streptomycin (Sigma-Aldrich) and  
570 incubated at 37°C and 5% CO<sub>2</sub>.

571  
572 **PVC gene reporter plasmid construction.** Translational fusions with the *gfpmut2*  
573 gene were constructed by PCR in a pACYC184 vector containing the *gfpmut2* (pACYC-  
574 GFP) [57] as follows. The *pvc1*, *pnf* and *rpsM* genes (consisting of promoter regions and  
575 the first 150 bp of coding sequence) were amplified from *P. asymbiotica*<sup>ATCC43949</sup>  
576 genomic DNA and cloned into pACYC-*gfp* to generate pACYC-*afp1-gfp*, pACYC-*pnf-gfp*  
577 and pACYC-*rpsM-gfp*. The constructs were further digested to release the *pvc1*, *pnf* or  
578 *rpsM* genes in frame with *gfp* and the fusion fragments were cloned into pBBR1-MCS  
579 [58] to generate pBBR1-*pvc1-gfp*, pBBR1-*pnf-gfp* and pBBR1-*rpsM-gfp*. Mating  
580 experiments were performed as previously described [59] to transfer plasmid constructs  
581 into *P. luminescens*<sup>TT01</sup> resulting in *PI*<sup>TT01</sup>-*pvc1-gfp*, *PI*<sup>TT01</sup>-*pnf-gfp* and *PI*<sup>TT01</sup>-*rpsM-gfp*.  
582 Plasmid stability was confirmed in bacteria harbouring the various constructs isolated  
583 after *in vivo* passages. For the expanded panel of *gfp*-reporter fusions, the promoter  
584 regions for the operons selected, inclusive of the putative RfaH operator sites, and the  
585 native RBS and first codon of the *pvc1* gene (approximately 500 bp upstream), were  
586 cloned in to the pAGAG vector. pAGAG was derivatised from the promoterless pGAG1  
587 *gfp* bearing plasmid. In brief, pGAG1 was used as a template to amplify *gfpmut3*\*  
588 without a start codon using primers pG\_GFPfor (5'-  
589 AATGTCGACCGTAAAGGAGAAGAAGCTTTTC-3') and pG\_GFPprev (5'-  
590 AATACTAGTGGATCTATTTGTATAGTTCATCCATG-3'). The resulting product and the  
591 pGAG1 vector were cut by digestion with Sall-HF and Spel and ligated together, thus  
592 replacing the original intact *gfpmut3*\* gene with one that lacks a ribosome binding site  
593 and the first ATG codon. Thus, 5' regions introduced subsequently restored the

594 construct. All upstream regions were incorporated between the KpnI and BamHI sites of  
595 the resulting pAGAG vector. The Pnf reporter discussed in this paper specifically  
596 (Figure S4), was amplified using the primers (PB68.1Pnf-BamHI F 5'-  
597 ATAGGATCCATCCCAACGTATCTTGTCC-3' and PB68.1Pnf-KpnI R 5'-  
598 ATTGGTACCTGTACTIONTGTAGACATAAAAAGCCC-3'

599

## 600 **Fluorescent reporter strain assays**

601 ***In vitro* experiments.** Reporter strains were cultured with shaking aeration in LB liquid  
602 medium supplemented with 20% (v/v) freshly harvested 5<sup>th</sup> instar *M. sexta* clarified  
603 hemolymph. To obtain the hemolymph, insects were chilled on ice for 20 minutes before  
604 being bled (by cutting the tip of the tail horn) into a tube on ice, containing 10 µl of  
605 saturated Phenol Thio Urea (PTU) solution, which prevents melanisation. Hemolymph  
606 was clarified by centrifugation to remove hemocytes and other debris. Bacteria were  
607 grown to late stationary phase, before microscopic visualisation using a Leica inverted  
608 epi-fluorescent microscope. ***In vivo* experiments,** we injected ca. 100 cells of the  
609 reporter strains into cohorts of 5<sup>th</sup> instar *M. sexta*, and allowed the infection to establish  
610 before macroscopic examination of insect tissues using a (fluorescence) dissecting  
611 microscope. We also took hemolymph samples from these insects and performed  
612 microscopic examination of fixed *ex vivo* hemocytes stained with phalloidin conjugate  
613 and confocal microscopy to visualise host cell cytoskeleton and any GFP expression  
614 from the recombinant bacteria. Images were acquired with a LSM510 confocal  
615 microscope (Leica).

616

## 617 **PVC purification from *E. coli* cosmid clone supernatants and electron**

618 **microscopy.** Cosmid libraries of *P. asymbiotica*<sup>ATCC43949</sup> were prepared in *E. coli*  
619 EC100 and arrayed into 96-well microtiter plates by MWG Biotech, Munich, Germany,  
620 as described previously [13, 28]. A 250ml overnight culture of *E. coli* with the *Pa*<sup>ATCC43949</sup>  
621 PVC*pnf* cosmid (c4DF10) was grown in LB medium supplemented with 100 µg ml<sup>-1</sup>  
622 ampicillin at 28°C with aeration in the dark. The culture was centrifuged at 6800 x g at  
623 4°C for 30 min at 4°C. The supernatant was decanted to remove each cell pellet, and  
624 the centrifugation procedure was repeated to remove any remaining cells. Cell-free

625 supernatants were then centrifuged, in small batches, at  $150,000 \times g$  for 90 min at  $4^{\circ}\text{C}$   
626 to harvest particulate material. The particulate pellets were washed by gentle re-  
627 suspension in  $1\times$  Phosphate Buffered Saline (PBS) before a second centrifugation at  
628  $150,000 \times g$  for 90 min at  $4^{\circ}\text{C}$  to pellet the particulate material. Each pellet was further  
629 separated by DEAE-Sepharose chromatography. 10 ml of particulate material in ice-  
630 cold PBS were mixed with an equivalent volume of DEAE-Sepharose CL-6B anion  
631 exchanger (in PBS) and the preparation was incubated at room temperature for 15 min.  
632 The Sepharose resin was harvested by centrifugation ( $3,000 \times g$ ), and the supernatant  
633 was discarded. The resin was resuspended in 40 ml of ice-cold PBS and again  
634 harvested by centrifugation. This washing step was repeated another three times, and  
635 the resin was finally resuspended in 10 ml of elution buffer (0.5 M NaCl, 50 mM  
636 phosphate buffer [pH 7.4]). The resin was removed by centrifugation, and the  
637 supernatant containing the PVCs was again centrifuged at  $150,000 \times g$  for 90 min at  
638  $4^{\circ}\text{C}$  to pellet the particulate material and concentrate the needle structures in 500  $\mu\text{l}$  of  
639 ice-cold PBS.

640  
641 For transmission electron microscopy (TEM) pioloform-covered 300-mesh copper grids  
642 that were coated with a fine layer of carbon were used as substrates for the protein  
643 fractions. The following four aqueous negative stains were tested with the protein  
644 samples: 1% uranyl acetate, 3% ammonium molybdate, 3% methylamine tungstate, and  
645 2% sodium silicotungstate. The preferred stain, 3% methylamine tungstate, produced  
646 acceptable contrast and minimum artefacts and was subsequently used for all samples  
647 viewed by TEM. The coated grids were exposed to UV light for 16 h immediately prior to  
648 use to ensure adequate wetting of the substrate. A 10  $\mu\text{l}$  drop was applied to the TEM  
649 grid, and the protein was allowed to settle for 5 min. Liquid was absorbed with filter  
650 paper from the edge of the grid and replaced immediately with 10  $\mu\text{l}$  of filtered negative  
651 stain. The drop was partially removed with filter paper, and the grids were allowed to air  
652 dry thoroughly before they were viewed with a JEOL 1200EX transmission electron  
653 microscope (JEOL, Tokyo, Japan) operating at 80 kV.  
654



655 **Pnf cloning and heterologous expression for *Galleria* injection and antibody**  
656 **specificity test.** *Pnf* gene was amplified from *P. asymbiotica*<sup>ATCC43949</sup> genomic DNA  
657 (using primers Pnf\_NdeI 5'-ATATATCATATGATGTTAAAATATGCTAATCCT-3',  
658 Pnf\_BamHI 5'-ATATATGGATCCTTATAACAACCGTTTTTTAAG-3') and the PCR  
659 product was purified and cloned in-frame with a His-tag into the IPTG-inducible  
660 expression plasmid pET-15b (Novagen) to create construct pET15b-Pnf. The clone was  
661 verified by sequencing and transformed into Arctic Express competent cells (Agilent) for  
662 protein expression. A site-directed mutant of Pnf (toxoid) was generated with either the  
663 QuikChange site-directed mutagenesis kit (Agilent). To construct the Pnf mutant  
664 plasmid pET15b-Pnf<sub>C190A</sub>, pET15b-Pnf was amplified with FPLC-purified primers  
665 designed to generate a Cys to Ala substitution at position 190 (Pnf<sub>C190A</sub>\_for 5'-  
666 TCACCGAATATACCATAGTAGCACCGCTCAATGCTCCAGAC-3', Pnf<sub>C190A</sub>\_rev 5'-  
667 GTCTGGAGCATTGAGCGGTGCTACTATGGTATATTCGGTGA-3') using the following  
668 thermal profile (step 1: 95°C for 30 s, step 2: 95°C for 30 s, 55°C for 60 s, 68°C for 6  
669 min 45 s for 16 cycles). The identity of six different positive clones was confirmed by  
670 sequencing. Subsequently, -80°C glycerol stocks were used to inoculate 5 ml of fresh  
671 LB medium supplemented with 0.2% (w/v) glucose and 100 µg ml<sup>-1</sup> ampicillin. Bacteria  
672 were grown overnight at 30°C with shaking, and 1 ml of the culture was then harvested,  
673 re-suspended in 100 ml of the same medium, and incubated in an orbital incubator at  
674 37°C until the optical density at 600 nm was 0.7 to 0.9. Cells were then harvested at  
675 room temperature by centrifugation at 4,000 rpm for 10 min. The pellet was re-  
676 suspended in 100 ml of fresh LB medium supplemented with the 100 µg ml<sup>-1</sup> ampicillin  
677 and 0.1 mM of the inducer isopropyl-β-d-thiogalactopyranoside (IPTG). Optimized times  
678 for inductions were determined experimentally, and cells were then harvested. The  
679 bacterial cell pellet was re-suspended in 10 ml of 1x PBS and sonicated (four 20-s  
680 sonications at 45 mA using a Branson 450 digital Sonifier) fitted with a tapered probe.  
681 The freshly sonicated samples were then diluted in 1x PBS for injection into *Galleria*  
682 larvae and for SDS-polyacrylamide gel electrophoresis analysis to confirm expression of  
683 the target protein. For toxicity testing cohorts of *Galleria* larvae (n=20) were chilled on  
684 ice before injection with 10 µl of a dilution series (in sterile PBS) of sonicated cells

685 expressing Pnf or vector control. Insects were then returned to room temperature and  
686 observed for 5 days or mortality or morbidity.

687

688 **Recombinant Pnf and small Rho-GTPase purification.** ArcticExpress containing  
689 pET-15b-Pnf were initially grown in LB broth supplemented with  $100 \mu\text{g ml}^{-1}$  ampicillin  
690 at  $37^\circ\text{C}$  until OD 0.6 when Pnf expression was induced with a final concentration of  
691 0.1 mM of IPTG at  $12^\circ\text{C}$  for 16 h to produce soluble Pnf. Pnf was purified over  
692 HisTrap™  $\text{Ni}^{2+}$ -affinity column with the fast phase liquid chromatography (FPLC) AKTA  
693 system as per the manufacturer's protocol (GE Healthcare). Plasmids pGEX-2T-  
694 wtRhoA, pGEX-2T-wtRac1 and pGEX-2T-G25K (Cdc42) were gifts from Prof Alan Hall  
695 (University College London, London, UK) and were maintained in *E. coli* DH5 $\alpha$  grown  
696 on LB agar or in LB broth supplemented with  $50 \mu\text{g ml}^{-1}$  ampicillin. RhoA, Rac1 and  
697 Cdc42 were purified over GSTrap HP™ affinity columns with the FPLC AKTA system as  
698 per the manufacturer's protocol (GE Healthcare).

699

700 **BioPORTER assay and actin stress fibre analysis.** For BioPORTER assays, 80  $\mu\text{l}$  of  
701 purified wild type and mutant Pnf proteins ( $500 \mu\text{g ml}^{-1}$ ), or PBS as a negative control,  
702 were added to one BioPORTER tube (Genlantis) and resuspended in 920  $\mu\text{l}$  of DMEM.  
703 The samples were added to HeLa cells grown in 6-well plates and incubated for 4 h.  
704 BioPORTER/protein or PBS mixes were replaced by fresh complete medium and the  
705 cells were incubated for 20–48 h. To visualize cell morphology and actin cytoskeleton,  
706 cells were fixed for 15 min in 4% PBS-formaldehyde, permeabilized with 0.1% Triton X-  
707 100 and stained with Tetramethylrhodamine B isothiocyanate (TRITC)-phalloidin  
708 (Sigma) and DAPI dihydrochloride (Sigma). Images were acquired with a LSM510  
709 confocal microscope (Leica).

710

711 **Deamidation and Transglutamination of Rho GTPases.**

712 **Deamidation assay:** Deamidation assays were done according to previously  
713 described procedures [60] with the following modifications. Briefly, a 20:1 molar ratio of  
714 GTPase (RhoA, Rac1 or Cdc42) to toxin was incubated in deamidation buffer (50 mM  
715 NaCl, 50 mM Tris-HCl pH 7.4, 5 mM  $\text{MgCl}_2$ , 1 mM DTT, 1 mM phenylmethanesulphonyl

716 fluoride) for either 30 min or 2.5 h at 37°C. Untreated RhoA served as a negative  
717 control. After toxin treatment, samples were concentrated by the addition of 10%  
718 trichloroacetic acid and stored overnight at 4°C. Precipitated proteins were pelleted,  
719 washed with acetone, air-dried and resuspended in 20 mM Tris-HCl pH 7.4. Samples  
720 were subjected to SDS-PAGE and analysed by Western blotting using either an anti-  
721 RhoA (1:1500, Santa Cruz Biotechnology), anti-Rac1 (1:5000, Upstate Biotechnology),  
722 or anti-Cdc42 (1:1000, Santa Cruz Biotechnology) monoclonal antibody or rabbit  
723 polyclonal antisera (1:2000) that had been raised against a peptide antigen specifically  
724 designed to detect modified/deamidated RhoA/Rac1/Cdc42 [61], provided by Prof A. D.  
725 O'Brien, Department of Microbiology and Immunology at Uniformed Services University,  
726 Maryland, USA). Reactive proteins were detected with either the HRP-conjugated goat  
727 anti-mouse IgG (Sigma) or donkey anti-rabbit IgG (1:3000, Sigma) followed by  
728 visualization with DAB (Sigma). **Transglutamination assay:** Transglutamination assays  
729 were done as previously described [62] with several modifications. Briefly, a 2:1 molar  
730 ratio of RhoA to toxin was incubated in transglutamination buffer (50 mM Tris-HCl  
731 pH 7.4, 8 mM CaCl<sub>2</sub>, 5 mM MgCl<sub>2</sub>, 1 mM DTT, 1 mM EDTA) in the presence of  
732 ethylenediamine (50 mM, pH 9) for 10 min or 1 h at 37°C. As a negative control, RhoA  
733 was incubated with ethylenediamine but without toxin. Samples (0.25 µg RhoA/well)  
734 were subjected to SDS-PAGE and then processed for Western blot analyses as  
735 described above. Immunoblots were probed with a mouse anti-RhoA monoclonal  
736 antibody (1:1500, Santa Cruz Biotechnology) and reactive proteins visualized with DAB  
737 after incubation with the HRP-conjugated goat anti-mouse IgG secondary antibody.

738

## 739 **ACKNOWLEDGEMENTS**

740 This work would not have been possible without the much appreciated funding by  
741 BBSRC grants BB/C008367/1 and BB/E021328/1, The Leverhulme Trust grant RPG-  
742 2015-194, EPSRC (MOAC) DTP EP/F500378/1, MRC DTP in Interdisciplinary  
743 Biomedical Research MR/N014294/1 and the Warwick University Medical School. We  
744 would also like to acknowledge Chris Apark for maintaining and supplying the  
745 *Manduca sexta* insects from the University or Bath colony.

## 746 SUPPLEMENTARY INFORMATION

### 747 SUPPLEMENTARY METHODS

748 **A bioinformatic analysis of *pvc* structural operon sequences.** DNA sequences for  
749 each of the 16 conserved structural loci were clustered syntenically (all *pvc1*s, all *pvc2*'s  
750 etc.). % GC content for each CDS in each syntenic position was calculated (up to 16  
751 observations per locus), and plotted as a boxplot via ggplot2 (Figure S1A). The  
752 average GC content across the full operon, as well as for the whole genome, were  
753 plotted as intervals in the plot background to show the PVC loci %GC in contrast. The  
754 breakpoint was defined by use of the “cumSEG” package in R [63]. Amino acid similarity  
755 scores (Figure S1B) were generated by CLUSTAL Omega [64] multiple sequence  
756 alignment, using default parameters. Resulting pairwise alignment scores were plotted  
757 as boxplots using ggplot.

758 **RNA purification and RT-PCR.** For *in vitro* transcription analysis, overnight cultures of  
759 *P. asymbiotica* were sub-cultured into liquid LB medium and grown with aeration at  
760 28°C or 37°C 200 rpm in the dark. Planktonic cultures were collected at 4, 8 and 24 h  
761 and mixed with a double volume of RNAlater (Ambion) and after 5 minute incubation,  
762 bacteria were harvested by centrifugation and the pellets stored at -80°C. For *in vivo*  
763 transcription analysis, overnight cultures of *P. asymbiotica* were extensively washed in  
764 PBS and diluted in Grace's insect media (GIM) to achieve 1000 bacteria per 50 µl of  
765 culture. Each *M. sexta* larvae was injected with 50 µl of *P. asymbiotica* culture and they  
766 were placed in a humid temperature controlled room at 28°C. After 3h or 6 h of  
767 incubation, insects were bled in equal volume of GIM containing 20mM  
768 phenylthiocarbamide (PTC). The sample was initially fractionated into plasma and total  
769 hemocytes by centrifugation at 200 x g at 4°C for 5 min, and plasma was further  
770 centrifuged at 6800 x g at 4°C for 5 min to form a bacterial pellet. For each condition,  
771 total RNA was extracted using the RNeasy Mini Kit (Qiagen) and 2 µg total RNA was  
772 treated with TURBO DNA-free Kit (Ambion) and subjected to RT-PCR using the Qiagen  
773 OneStep RT-PCR kit. Each RT-PCR reaction performed in a volume of 50 µl (containing  
774 100 ng template RNA, 1x QIAGEN OneStep RT-PCR buffer, 400 µM dNTPs, 0.6 µM

775 gene specific primers, 5U RNase inhibitor and 2 µl of QIAGEN OneStep RT-PCR  
776 enzyme mix) for 28 cycles.

777

778 **SUPPLIMENTARY FIGURES**

A

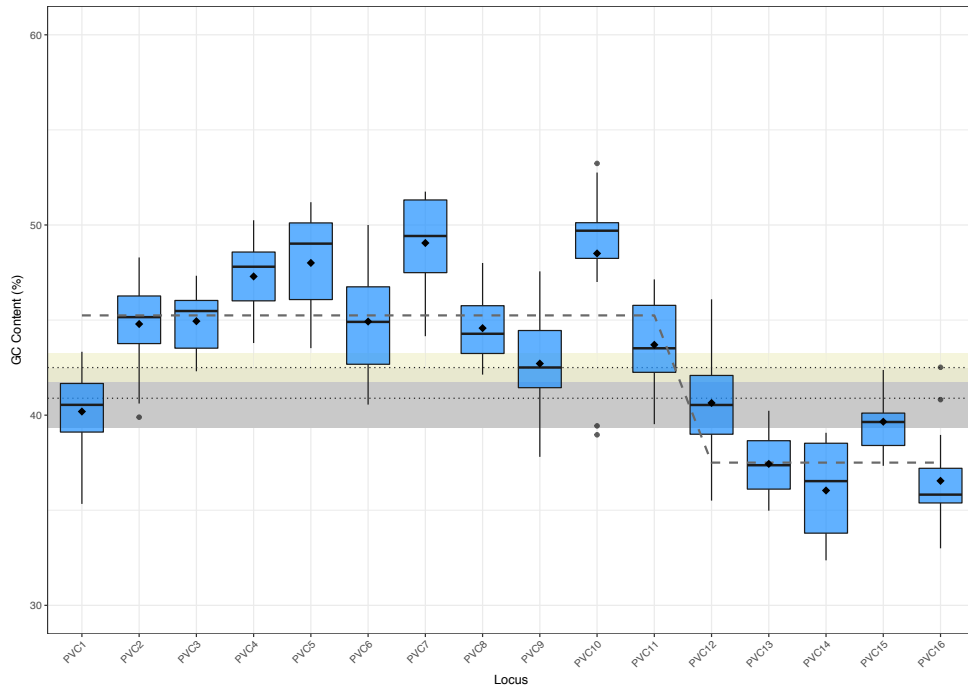

779

B

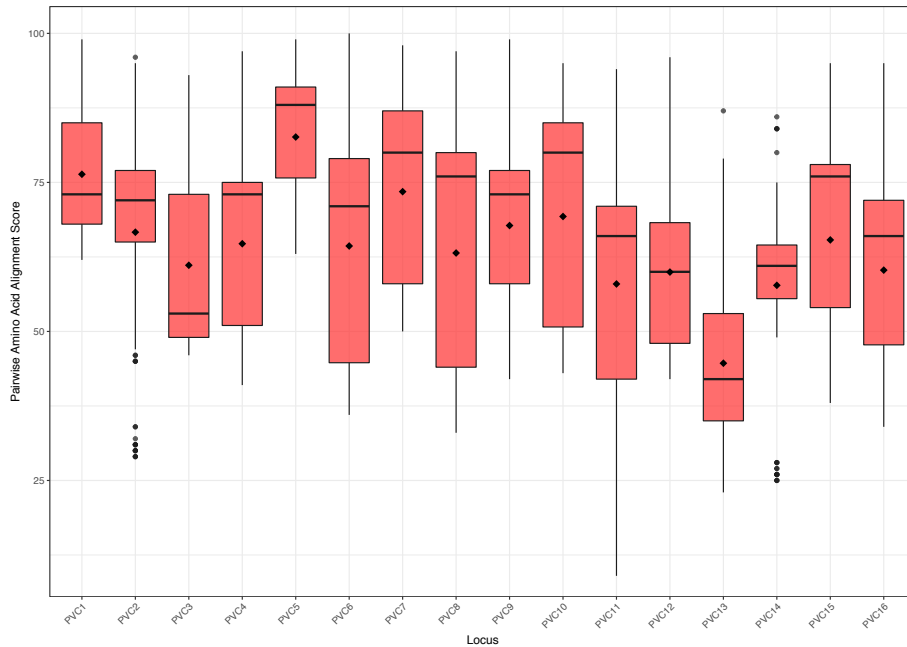

780

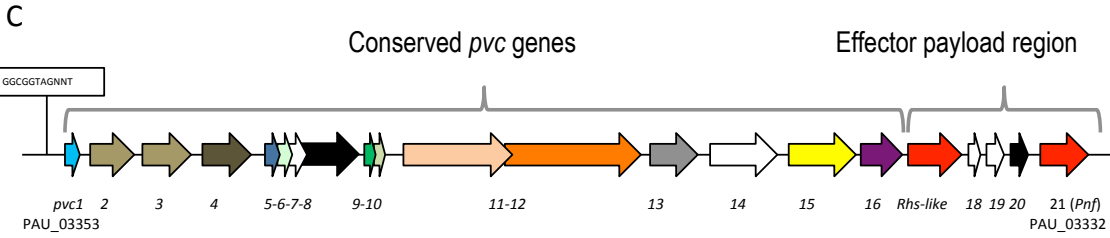

11

| PaATCC43949_PVCpnf Protein | Locus Tag | Probability | E-Value  | P-Value  | Predicted function              | PDBhit | Description                                                                                                        |
|----------------------------|-----------|-------------|----------|----------|---------------------------------|--------|--------------------------------------------------------------------------------------------------------------------|
| Pvc1                       | PAU_03353 | 62.9        | 2.7      | 7.10E-05 | Inner stylet (Hcp like)         | 3eaa_A | EVPC; T6SS [Edwardsiella tarda]                                                                                    |
| Pvc2                       | PAU_03352 | 100         | 2.00E-34 | 5.30E-39 | Outer sheath                    | 3j9q_A | Sheath; pyocin, bacteriocin, sheath [Pseudomonas aeruginosa]                                                       |
| Pvc3                       | PAU_03351 | 99.9        | 4.00E-33 | 1.00E-37 | Outer sheath                    | 3j9q_A | Sheath; pyocin, bacteriocin, sheath [Pseudomonas aeruginosa]                                                       |
| Pvc4                       | PAU_03350 | 99.8        | 6.50E-26 | 1.70E-30 | Outer sheath                    | 3j9q_A | Sheath; pyocin, bacteriocin, sheath [Pseudomonas aeruginosa]                                                       |
| Pvc5                       | PAU_03349 | 92.7        | 0.017    | 4.40E-07 | Inner stylet (Hcp like)         | 3eaa_A | EVPC; T6SS [Edwardsiella tarda]                                                                                    |
| Pvc6                       | PAU_03348 | 78.2        | 0.68     | 1.80E-05 | unknown                         | 4aaa_A | Cyclin-dependent kinase-like 2 [Homo sapiens]                                                                      |
| Pvc7                       | PAU_03347 | 36.8        | 14       | 0.00036  | unknown                         | 2z6x_B | DOA4-independent degradation protein 4; protein transport [Saccharomyces cerevisiae]                               |
| Pvc8                       | PAU_03346 | 99.9        | 8.20E-29 | 2.10E-33 | membrane penetration            | 4uhv_A | VGRG1, valine-glycine repeat protein G1, puncture device spike, T6SS [Pseudomonas aeruginosa]                      |
| Pvc9                       | PAU_03345 | 99.7        | 1.00E-21 | 2.60E-26 | unknown                         | 2ia7_A | Putative tail lysozyme gp25-like [Geobacter sulfurreducens]                                                        |
| Pvc10                      | PAU_03344 | 82          | 0.4      | 1.10E-05 | PAAR domain spike               | 1ukf_A | Avirulence protein AVRPPH3; hypersensitive response hydrolase; [Pseudomonas syringae PV]                           |
| Pvc11                      | PAU_03343 | 97.4        | 4.40E-07 | 1.20E-11 | Complex baseplate               | 3h2t_A | Baseplate structural protein GP6; virion [Enterobacteria phage T4]                                                 |
| Pvc12                      | PAU_03342 | 39.3        | 12       | 0.00031  | unknown                         | 2ex2_A | Penicillin-binding protein 4; D-Ala alanine-carboxypeptidase, D-alanyl-D-alanine-endopeptidase, [Escherichia coli] |
| Pvc13                      | PAU_03341 | 98.1        | 2.80E-09 | 7.30E-14 | Tail fibre                      | 3izo_F | Fiber; pentameric penton base, trimeric viral protein; [Human adenovirus 5]                                        |
| Pvc14                      | PAU_03340 | 32.4        | 18       | 0.00047  | Tape measure protein (Afp14)    | 3c9p_A | Uncharacterized protein SP1917; [Streptococcus pneumoniae]                                                         |
| Pvc15                      | PAU_03339 | 99.9        | 2.10E-26 | 5.50E-31 | Effector loading                | 5g4f_A | AAA ATPase; unfoldase [Thermoplasma acidophilum]                                                                   |
| Pvc16                      | PAU_03338 | 29.2        | 22       | 0.00058  | Tail terminator protein (Afp16) | 5jbr_A | Uncharacterized protein BCVA_2135 [Beutenbergia cavernae]                                                          |
| Pvc17                      | PAU_03337 | 98.5        | 9.00E-11 | 2.40E-15 | effector                        | 1yrt_A | Bifunctional hemolysin-adenylate cyclase; CyaA toxin [Bordetella pertussis]                                        |
| Pvc18                      | PAU_03336 | 60.4        | 3.2      | 8.50E-05 | unknown                         | 5g4d_A | CAS2, crisp-associated endoribonuclease CAS2 [Thermococcus onnurineus]                                             |
| Pvc19                      | PAU_03334 | 62.7        | 2.7      | 7.20E-05 | unknown                         | 3gqe_A | Non-structural protein 3 [Venezuelan equine encephalitis virus]                                                    |
| Pvc20                      | PAU_03333 | 99.7        | 2.40E-21 | 6.30E-26 | regulator                       | 3fkq_A | LYSR type transcriptional regulator [Comamonas testosteroni]                                                       |
| Pvc21                      | PAU_03332 | 100         | 1.10E-64 | 2.80E-69 | effector                        | 1hq0_A | CNF1, cytotoxic necrotizing factor 1; RHO deamidase+transglutaminase toxin [Escherichia coli]                      |

781

782 **Figure S1. (A)** Boxplots of the mean GC content across 16 different *pvc* operons of  
 783 *Photorhabdus*. The GC was calculated for each of the 16 structural loci (clustered by  
 784 annotated/predicted function and syntenic position in operon consistent with the  
 785 nomenclature devised in this paper). GC content itself was calculated via a bespoke  
 786 script, outputting data to be visualised in RStudio. Data was plotted and the step-  
 787 function fit (black dashed line) was calculated using the mean GC value for each locus  
 788 via the *cumSeg* package for breakpoint estimation in genomic sequences. Diamonds  
 789 represent mean locus GC. Beige box shows the source genome mean (dotted line) GC  
 790 content and standard deviation (upper and lower box bounds). Grey box shows the  
 791 operon GC mean (dotted line) and standard deviation (upper and lower box bounds).  
 792 **(B)** Box plots of amino acid similarity across homologous protein sequences for these  
 793 same 16 operons. Amino acid sequences were clustered together as in (A), by  
 794 annotation and syntenic position. Global Multiple Sequence Alignments were created  
 795 with CLUSTAL Omega, using the default parameters (Gonnet transition matrix, gap  
 796 open penalty 6 bits, gap extend 1 bit). Pairwise amino acid alignment scores were  
 797 extracted from the CLUSTALO output and plotted in RStudio via bespoke scripts.  
 798 Diamonds indicate mean pairwise alignment scores. Dots indicate pairwise values that  
 799 are outliers, beyond 1.5 X the interquartile range (as automatically calculated by the  
 800 ggplot2 package). **(C)** A map of the model class I *Pa*<sup>ATCC43949</sup> *PVCpnf* operon showing  
 801 two effector genes in the payload region in red/orange.

802

803

804

805





809 by the blue rectangle. Alien Hunter regions of HGT are designated by the features in  
 810 tones of red. In red are the regions with the highest score and thus probability for HGT  
 811 whilst in white are the regions with the lowest scores. **(C)** The *P. asymbiotica*<sup>ATCC43949</sup>  
 812 chromosome. The first concentric circle denotes genes on the forward strand while the  
 813 second circle denotes genes in the reverse strand. In dark green are the PVC operons.  
 814 The third circle shows regions of HGT as identified by Alien Hunter.

815

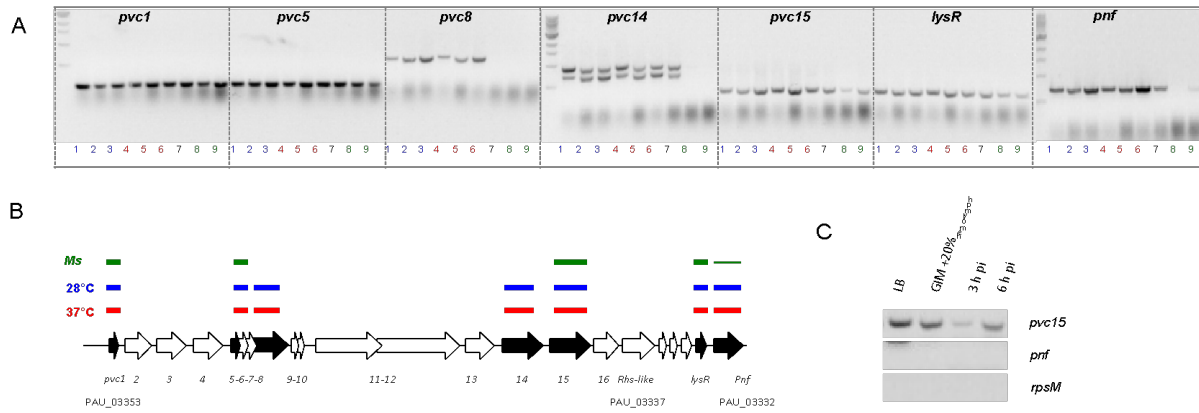

816

817 **Figure S3. (A)** RT-PCR analysis of gene transcription of various genes of the  
 818 *Pa*<sup>ATCC43949</sup> *PVCpnf* operon over time *in vitro* at insect (28°C) and human (37°C)  
 819 relevant temperatures and *in vivo* during *Manduca sexta* (*Ms*) infection. Lane key; lanes  
 820 1, 2 and 3 (blue) represent *in vitro* growth in aerated LB at 28°C for 4, 8 and 24h  
 821 respectively; lanes 4, 5 and 6 (red) are growth in aerated LB at 37°C for 4, 8 and 24h;  
 822 lane 7 (black) is growth in LB at 28°C for 16h; lanes 8 and 9 (green) are from 3h and 6h  
 823 post infection blood of *Ms* infected with *P. asymbiotica* at 28°C. **(B)** Map of the operon  
 824 showing RT-PCR target genes in black. The lane-colour coded bars above the ORFs  
 825 summarise in which conditions gene transcription could be detected. Note *pvc8* and  
 826 *pvc14* mRNA could not be detected from infected *Ms* and the *pnf* mRNA was only  
 827 detected after 6h of infection. **(C)** RT-PCR signals for *pvc15* and *pnf* from infected  
 828 insects with the *rpsM* (ribosomal subunit protein S13) loading control. Lanes represent  
 829 (in order); 4h growth in LB at 28°C; 4h growth in Grace's insect medium supplemented  
 830 with 20% (v/v) *Ms* hemolymph; 3h and 6h post infection *ex vivo* blood of *Ms* infected  
 831 with *P. asymbiotica* at 28°C.

832

**A**

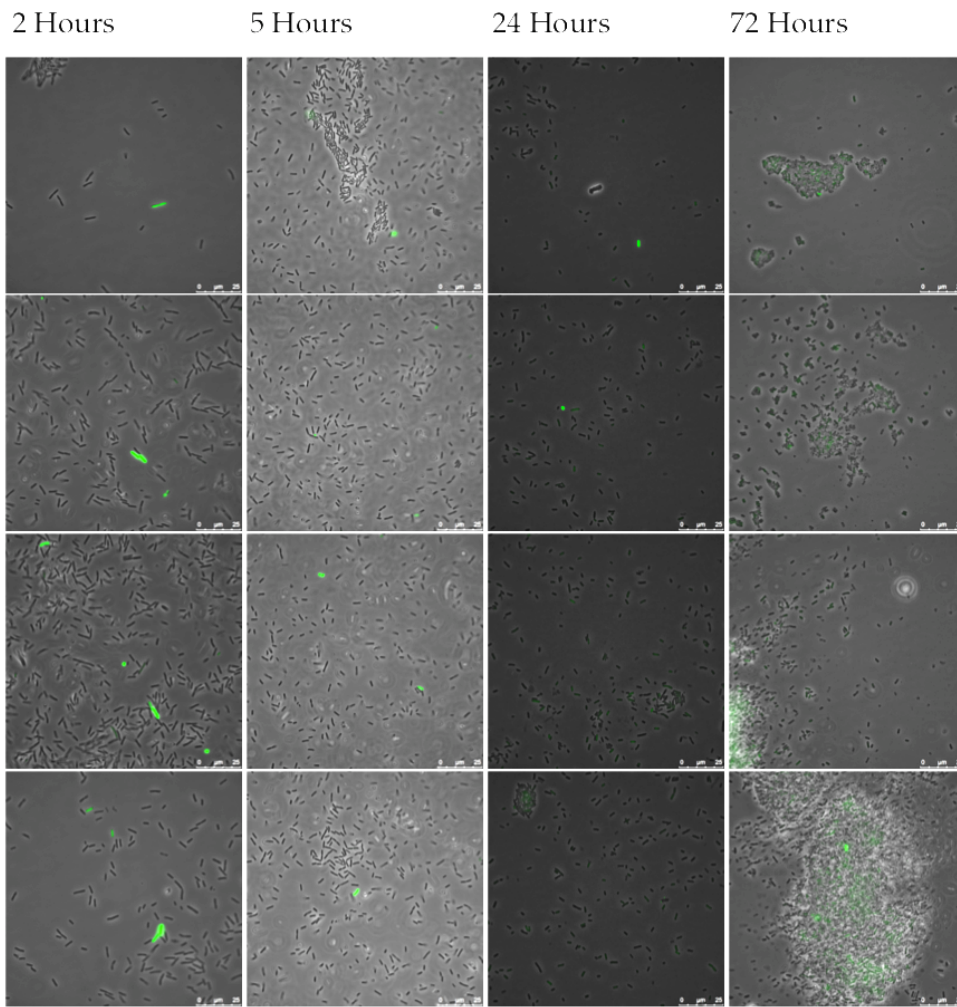

833

+++

+++

++

++

**B**

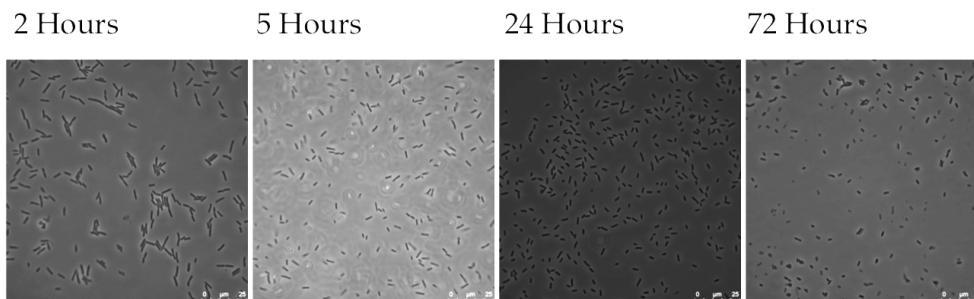

834

-

-

-

-

835 **Figure S4.** A representative selection of images for 4 time points, for *P. asymbiotica*  
836 PB68.1 (*Pa*<sup>PB68</sup>) harbouring **(A)** the *Pa*<sup>PB68</sup> *PVCpnf pvc1* promoter fusion construct or  
837 **(B)** pAGAG negative control reporter plasmid with no promoter. For **(A)** quadruplicate  
838 images are displayed vertically as representative of the whole slide sample. Key to  
839 qualitative fluorescence indication: “-” is no fluorescence, “++” is low level fluorescence  
840 in many cells or a few brighter cells, “+++” is intermediate to high fluorescence in almost  
841 all cells, or some very bright isolated cells.

842

## 843 REFERECES

844

- 845 1. Forst, S., et al., *Xenorhabdus and Photorhabdus spp.: bugs that kill bugs*. Annu Rev  
846 Microbiol, 1997. **51**: p. 47-72.
- 847 2. Ciche, T.A., et al., *Cell Invasion and Matricide during Photorhabdus luminescens*  
848 *Transmission by Heterorhabditis bacteriophora Nematodes*. Appl Environ Microbiol,  
849 2008. **74**(8): p. 2275-87.
- 850 3. Somvanshi, V.S., et al., *A single promoter inversion switches Photorhabdus between*  
851 *pathogenic and mutualistic states*. Science, 2012. **337**(6090): p. 88-93.
- 852 4. Machado, R.A.R., et al., *Whole-genome-based revisit of Photorhabdus phylogeny:*  
853 *proposal for the elevation of most Photorhabdus subspecies to the species level and*  
854 *description of one novel species Photorhabdus bodei sp. nov., and one novel subspecies*  
855 *Photorhabdus laumondii subsp. clarkei subsp. nov.* Int J Syst Evol Microbiol, 2018.  
856 **68**(8): p. 2664-2681.
- 857 5. Gerrard, J., et al., *Human infection with Photorhabdus asymbiotica: an emerging*  
858 *bacterial pathogen*. Microbes Infect, 2004. **6**(2): p. 229-37.
- 859 6. Gerrard, J.G., et al., *Nematode symbiont for Photorhabdus asymbiotica*. Emerging  
860 Infectious Diseases, 2006. **12**(10): p. 1562-1564.
- 861 7. Gerrard, J.G., et al., *Photorhabdus species: bioluminescent bacteria as emerging human*  
862 *pathogens?* Emerg Infect Dis, 2003. **9**(2): p. 251-4.
- 863 8. Gerrard, J.G., R. Vohra, and G.R. Nimmo, *Identification of Photorhabdus asymbiotica in*  
864 *cases of human infection*. Commun Dis Intell, 2003. **27**(4): p. 540-1.
- 865 9. Waterfield, N.R., T. Ciche, and D. Clarke, *Photorhabdus and a host of hosts*. Annu Rev  
866 Microbiol, 2009. **63**: p. 557-74.
- 867 10. ffrench-Constant, R.H., et al., *Photorhabdus: Genomics of a pathogen and symbiont*.  
868 Bacterial Pathogenomics-Print, ed. M.J. Pallen and K.E. Nelson. 2007. 419-439.
- 869 11. Waterfield, N.R., P.J. Daborn, and R.H. ffrench-Constant, *Genomic islands in*  
870 *Photorhabdus*. Trends Microbiol, 2002. **10**(12): p. 541-5.
- 871 12. Duchaud, E., et al., *The genome sequence of the entomopathogenic bacterium*  
872 *Photorhabdus luminescens*. Nat Biotechnol, 2003. **21**(11): p. 1307-13.
- 873 13. Waterfield, N.R., et al., *Rapid Virulence Annotation (RVA): Identification of virulence*  
874 *factors using a bacterial genome library and multiple invertebrate hosts (vol 105, pg*  
875 *15967, 2008)*. Proceedings of the National Academy of Sciences of the United States of  
876 America, 2009. **106**(6): p. 2083-2083.

- 877 14. Wilkinson, P., et al., *Comparative genomics of the emerging human pathogen*  
878 *Photorhabdus asymbiotica with the insect pathogen Photorhabdus luminescens*. BMC  
879 Genomics, 2009. **10**: p. 302.
- 880 15. Cai, X., et al., *Entomopathogenic bacteria use multiple mechanisms for bioactive peptide*  
881 *library design*. (1755-4349 (Electronic)).
- 882 16. Bozhuyuk, K.A.J., et al., *Natural Products from Photorhabdus and Other*  
883 *Entomopathogenic Bacteria*. (0070-217X (Print)).
- 884 17. ffrench-Constant, R.H. and D.J. Bowen, *Novel insecticidal toxins from nematode-*  
885 *symbiotic bacteria*. Cell Mol Life Sci, 2000. **57**(5): p. 828-33.
- 886 18. Waterfield, N., et al., *Oral toxicity of Photorhabdus luminescens W14 toxin complexes in*  
887 *Escherichia coli*. Appl. Environ. Microbiol., 2001. **67**(11): p. 5017-24.
- 888 19. Waterfield, N.R., et al., *The tc genes of Photorhabdus: a growing family*. Trends  
889 Microbiol, 2001. **9**(4): p. 185-91.
- 890 20. Meusch, D., et al., *Mechanism of Tc toxin action revealed in molecular detail*. Nature,  
891 2014. **508**(7494): p. 61-5.
- 892 21. David L. Erickson, N.R.W., Viveka Vadyvaloo, Daniel Long, Elizabeth R. Fischer,  
893 Richard ffrench-Constant, and B. Joseph Hinnebusch, *Acute oral toxicity of Yersinia*  
894 *pseudotuberculosis to Xenopsylla cheopis: implications for the evolution of flea-borne*  
895 *transmission of Yersinia pestis*. in preparation, 2006.
- 896 22. Erickson, D.L., et al., *Acute oral toxicity of Yersinia pseudotuberculosis to fleas:*  
897 *implications for the evolution of vector-borne transmission of plague*. Cell Microbiol,  
898 2007. **9**(11): p. 2658-66.
- 899 23. Waterfield, N., et al., *The insect toxin complex of Yersinia*. Adv Exp Med Biol, 2007.  
900 **603**: p. 247-57.
- 901 24. Hares, M.C., et al., *The Yersinia pseudotuberculosis and Yersinia pestis toxin complex is*  
902 *active against cultured mammalian cells*. Microbiology-Sgm, 2008. **154**: p. 3503-3517.
- 903 25. Waterfield, N., et al., *The Photorhabdus Pir toxins are similar to a developmentally*  
904 *regulated insect protein but show no juvenile hormone esterase activity*. FEMS Microbiol  
905 Lett, 2005. **245**(1): p. 47-52.
- 906 26. Ahantarig, A., et al., *PirAB Toxin from Photorhabdus asymbiotica as a Larvicide against*  
907 *Dengue Vectors*. Applied and Environmental Microbiology, 2009. **75**(13): p. 4627-4629.
- 908 27. Sirikharin, R., et al., *Characterization and PCR Detection Of Binary, Pir-Like Toxins*  
909 *from Vibrio parahaemolyticus Isolates that Cause Acute Hepatopancreatic Necrosis*  
910 *Disease (AHPND) in Shrimp*. (1932-6203 (Electronic)).
- 911 28. Daborn, P.J., et al., *A single Photorhabdus gene, makes caterpillars floppy (mcf), allows*  
912 *Escherichia coli to persist within and kill insects*. Proceedings of the National Academy  
913 of Sciences of the United States of America, 2002. **99**(16): p. 10742-10747.
- 914 29. Waterfield, N.R., et al., *The insecticidal toxin makes caterpillars floppy 2 (Mcf2) shows*  
915 *similarity to HrmA, an avirulence protein from a plant pathogen*. Fems Microbiology  
916 Letters, 2003. **229**(2): p. 265-270.
- 917 30. Dowling, A.J., et al., *The Mcf1 toxin induces apoptosis via the mitochondrial pathway*  
918 *and apoptosis is attenuated by mutation of the BH3-like domain*. Cellular Microbiology,  
919 2007. **9**(10): p. 2470-2484.
- 920 31. Yang, G., et al., *Photorhabdus virulence cassettes confer injectable insecticidal activity*  
921 *against the wax moth*. J Bacteriol, 2006. **188**(6): p. 2254-61.

- 922 32. Ghequire, M.G. and R. De Mot, *The Tailocin Tale: Peeling off Phage Tails*. Trends  
923 Microbiol, 2015. **23**(10): p. 587-90.
- 924 33. Hapeshi, A. and N.R. Waterfield, *Photorhabdus asymbiotica as an Insect and Human*  
925 *Pathogen*. Curr Top Microbiol Immunol, 2017. **402**: p. 159-177.
- 926 34. Hurst, M.R., T.R. Glare, and T.A. Jackson, *Cloning Serratia entomophila antifeeding*  
927 *genes--a putative defective prophage active against the grass grub Costelytra zealandica*.  
928 J Bacteriol, 2004. **186**(15): p. 5116-28.
- 929 35. Heymann, J.B., et al., *Three-dimensional structure of the toxin-delivery particle*  
930 *antifeeding prophage of Serratia entomophila*. J Biol Chem, 2013. **288**(35): p. 25276-84.
- 931 36. Durand, E., et al., *Biogenesis and structure of a type VI secretion membrane core*  
932 *complex*. Nature, 2015. **523**(7562): p. 555-60.
- 933 37. Shikuma, N.J., et al., *Marine tubeworm metamorphosis induced by arrays of bacterial*  
934 *phage tail-like structures*. Science, 2014. **343**(6170): p. 529-33.
- 935 38. Sarris, P.F., et al., *A phage tail-derived element with wide distribution among both*  
936 *prokaryotic domains: a comparative genomic and phylogenetic study*. (1759-6653  
937 (Electronic)).
- 938 39. Wilkinson, P., et al., *New plasmids and putative virulence factors from the draft genome*  
939 *of an Australian clinical isolate of Photorhabdus asymbiotica*. FEMS Microbiol Lett,  
940 2010. **309**(2): p. 136-43.
- 941 40. Belogurov, G.A., et al., *Functional specialization of transcription elongation factors*.  
942 EMBO J, 2009. **28**(2): p. 112-22.
- 943 41. Mulley, G., et al., *From Insect to Man: Photorhabdus Sheds Light on the Emergence of*  
944 *Human Pathogenicity*. PLoS One, 2015. **10**(12): p. e0144937.
- 945 42. Vernikos, G.S. and J. Parkhill, *Interpolated variable order motifs for identification of*  
946 *horizontally acquired DNA: revisiting the Salmonella pathogenicity islands*.  
947 Bioinformatics, 2006. **22**(18): p. 2196-203.
- 948 43. Leiman, P.G., et al., *Morphogenesis of the T4 tail and tail fibers*. Virol J, 2010. **7**: p. 355.
- 949 44. Russell, A.B., S.B. Peterson, and J.D. Mougous, *Type VI secretion system effectors:*  
950 *poisons with a purpose*. Nat Rev Microbiol, 2014. **12**(2): p. 137-48.
- 951 45. Knust, Z. and G. Schmidt, *Cytotoxic Necrotizing Factors (CNFs)-A Growing Toxin*  
952 *Family*. Toxins (Basel), 2010. **2**(1): p. 116-27.
- 953 46. Kapitein, N. and A. Mogk, *Deadly syringes: type VI secretion system activities in*  
954 *pathogenicity and interbacterial competition*. Curr Opin Microbiol, 2013. **16**(1): p. 52-8.
- 955 47. Taylor, N.M.I., M.J. van Raaij, and P.G. Leiman, *Contractile injection systems of*  
956 *bacteriophages and related systems*. Mol Microbiol, 2018. **108**(1): p. 6-15.
- 957 48. Hurst, M.R., et al., *Isolation and characterization of the Serratia entomophila antifeeding*  
958 *prophage*. FEMS Microbiol Lett, 2007. **270**(1): p. 42-8.
- 959 49. Hurst, M.R., M. O'Callaghan, and T.R. Glare, *Peripheral sequences of the Serratia*  
960 *entomophila pADAP virulence-associated region*. Plasmid, 2003. **50**(3): p. 213-29.
- 961 50. Carter, H.D., V. Svetlov, and I. Artsimovitch, *Highly divergent RfaH orthologs from*  
962 *pathogenic proteobacteria can substitute for Escherichia coli RfaH both in vivo and in*  
963 *vitro*. J Bacteriol, 2004. **186**(9): p. 2829-40.
- 964 51. Tobias, N.J., et al., *Photorhabdus-nematode symbiosis is dependent on hfq-mediated*  
965 *regulation of secondary metabolites*. (1462-2920 (Electronic)).

- 966 52. Joyce, S.A. and D.J. Clarke, *A hexA homologue from Photorhabdus regulates*  
967 *pathogenicity, symbiosis and phenotypic variation*. Mol Microbiol, 2003. **47**(5): p. 1445-  
968 57.
- 969 53. Meijer, M., et al., *Nucleotide sequence of the origin of replication of the Escherichia coli*  
970 *K-12 chromosome*. Proc Natl Acad Sci U S A, 1979. **76**(2): p. 580-4.
- 971 54. Ge, P., et al., *Atomic structures of a bactericidal contractile nanotube in its pre- and*  
972 *postcontraction states*. Nat Struct Mol Biol, 2015. **22**(5): p. 377-82.
- 973 55. Reynolds, S.E. and S.F. Nottingham, *Food and water economy and its relation to growth*  
974 *in the 5th-instar larvae of the Tobacco Hornworm, Manduca sexta*. Journal of Insect  
975 Physiology, 1985. **31**: p. 119-127.
- 976 56. Thanwisai, A., et al., *Diversity of Xenorhabdus and Photorhabdus spp. and Their*  
977 *Symbiotic Entomopathogenic Nematodes from Thailand*. PLoS ONE, 2012. **7**(9).
- 978 57. Jacobi, C.A., et al., *In vitro and in vivo expression studies of yopE from Yersinia*  
979 *enterocolitica using the gfp reporter gene*. Mol Microbiol, 1998. **30**(4): p. 865-82.
- 980 58. Kanter-Smoler, G., A. Dahlkvist, and P. Sunnerhagen, *Improved method for rapid*  
981 *transformation of intact Schizosaccharomyces pombe cells*. Biotechniques, 1994. **16**(5):  
982 p. 798-800.
- 983 59. Brillard, J., et al., *The PhlA hemolysin from the entomopathogenic bacterium*  
984 *Photorhabdus luminescens belongs to the two-partner secretion family of hemolysins*. J  
985 Bacteriol, 2002. **184**(14): p. 3871-8.
- 986 60. Schmidt, G., et al., *Gln 63 of Rho is deamidated by Escherichia coli cytotoxic necrotizing*  
987 *factor-1*. Nature, 1997. **387**(6634): p. 725-9.
- 988 61. Sugai, M., et al., *Cytotoxic necrotizing factor type 2 produced by pathogenic Escherichia*  
989 *coli deamidates a gln residue in the conserved G-3 domain of the rho family and*  
990 *preferentially inhibits the GTPase activity of RhoA and rac1*. Infect Immun, 1999.  
991 **67**(12): p. 6550-7.
- 992 62. Schmidt, G., et al., *Identification of the C-terminal part of Bordetella dermonecrotic*  
993 *toxin as a transglutaminase for rho GTPases*. J Biol Chem, 1999. **274**(45): p. 31875-81.
- 994 63. Muggeo, V.M. and G. Adelfio, *Efficient change point detection for genomic sequences of*  
995 *continuous measurements*. Bioinformatics, 2011. **27**(2): p. 161-6.
- 996 64. Sievers, F., et al., *Fast, scalable generation of high-quality protein multiple sequence*  
997 *alignments using Clustal Omega*. Mol Syst Biol, 2011. **7**: p. 539.  
998
